# Supplementary material for: Nutritional Adequacy of Animal-Based and Plant-Based Asian Diets for Chronic Kidney Disease Patients: A Modeling Study
Source: MDPI journal article supplement (doi:10.3390/nu13103341), 2021-09-24
Supplement: s1 [file s1]

Sample Menu for Low Protein Diet (LPD) – 2100 kcal, 0.5 g/kg/d or 35 g/d protein  
**DAY 1 (South Indian Menu)**

| Conventional                                                                                                                                                                                                           | Vegan                                                                                                                                                                                                                      | Ovo-vegetarian                                                                                                                                                                                                             | Lacto-vegetarian                                                                                                                                                                                                   | Lacto-ovo vegetarian                                                                                                                                                                                               | Plant-dominant                                                                                                                                                                                                                                           |
|------------------------------------------------------------------------------------------------------------------------------------------------------------------------------------------------------------------------|----------------------------------------------------------------------------------------------------------------------------------------------------------------------------------------------------------------------------|----------------------------------------------------------------------------------------------------------------------------------------------------------------------------------------------------------------------------|--------------------------------------------------------------------------------------------------------------------------------------------------------------------------------------------------------------------|--------------------------------------------------------------------------------------------------------------------------------------------------------------------------------------------------------------------|----------------------------------------------------------------------------------------------------------------------------------------------------------------------------------------------------------------------------------------------------------|
| <b>Breakfast</b><br>2 pc dosa<br>2 tbsp curry gravy<br>1 cup tea, 1 tbsp sugar                                                                                                                                         | <b>Breakfast</b><br>2 pc dosa<br>2 tbsp curry gravy<br>1 cup tea, 1 tbsp sugar                                                                                                                                             | <b>Breakfast</b><br>2 pc dosa<br>2 tbsp curry gravy<br>1 cup tea, 1 tbsp sugar                                                                                                                                             | <b>Breakfast</b><br>2 pc dosa<br>2 tbsp curry gravy<br>1 cup tea, 1 tbsp sugar                                                                                                                                     | <b>Breakfast</b><br>2 pc dosa<br>2 tbsp curry gravy<br>1 cup tea, 1 tbsp sugar                                                                                                                                     | <b>Breakfast</b><br>2 pc dosa<br>2 tbsp curry gravy<br>1 cup tea, 1 tbsp sugar                                                                                                                                                                           |
| <b>Morning snack</b><br>½ pc mango<br>1 cup tea, 1 tbsp sugar                                                                                                                                                          | <b>Morning snack</b><br>½ pc mango<br>1 cup tea, 1 tbsp sugar                                                                                                                                                              | <b>Morning snack</b><br>½ pc mango<br>1 cup tea, 1 tbsp sugar                                                                                                                                                              | <b>Morning snack</b><br>½ pc mango<br>1 cup tea, 1 tbsp sugar                                                                                                                                                      | <b>Morning snack</b><br>½ pc mango<br>1 cup tea, 1 tbsp sugar                                                                                                                                                      | <b>Morning snack</b><br>½ pc mango<br>1 cup tea, 1 tbsp sugar                                                                                                                                                                                            |
| <b>Lunch</b><br>1 medium bowl white rice<br>¼ cup okra in tamarind<br>gravy<br>¼ cup French beans &<br>carrot<br>Chicken curry:<br>1 oz chicken<br>2 tbsp curry gravy<br>1 small bowl rasam<br>1 cup tea, 1 tbsp sugar | <b>Lunch</b><br>1 medium bowl white rice<br>¼ cup okra in tamarind<br>gravy<br>¼ cup French beans &<br>carrot<br>Chickpeas curry:<br>½ cup chickpea<br>2 tbsp curry gravy<br>1 small bowl rasam<br>1 cup tea, 1 tbsp sugar | <b>Lunch</b><br>1 medium bowl white rice<br>¼ cup okra in tamarind<br>gravy<br>¼ cup French beans &<br>carrot<br>Chickpeas curry:<br>½ cup chickpea<br>2 tbsp curry gravy<br>1 small bowl rasam<br>1 cup tea, 1 tbsp sugar | <b>Lunch</b><br>1 medium bowl white rice<br>¼ cup okra in tamarind<br>gravy<br>¼ cup French beans &<br>carrot<br>Chickpeas curry:<br>½ cup chickpea<br>2 tbsp curry gravy<br>½ cup curd<br>1 cup tea, 1 tbsp sugar | <b>Lunch</b><br>1 medium bowl white rice<br>¼ cup okra in tamarind<br>gravy<br>¼ cup French beans &<br>carrot<br>Chickpeas curry:<br>½ cup chickpea<br>2 tbsp curry gravy<br>½ cup curd<br>1 cup tea, 1 tbsp sugar | <b>Lunch</b><br>1 medium bowl white rice<br>¼ cup okra in tamarind<br>gravy<br>¼ cup French beans &<br>carrot<br>Chicken and chickpea<br>curry:<br>½ oz chicken<br>¼ cup chickpea<br>2 tbsp curry gravy<br>1 small bowl rasam<br>1 cup tea, 1 tbsp sugar |
| <b>Evening snack</b><br>1 pc apple<br>1 cup tea, 1 tbsp sugar                                                                                                                                                          | <b>Evening snack</b><br>1 pc apple<br>1 cup tea, 1 tbsp sugar                                                                                                                                                              | <b>Evening snack</b><br>1 pc apple<br>1 cup tea, 1 tbsp sugar                                                                                                                                                              | <b>Evening snack</b><br>1 pc apple<br>1 cup tea, 1 tbsp sugar                                                                                                                                                      | <b>Evening snack</b><br>1 pc apple<br>1 cup tea, 1 tbsp sugar                                                                                                                                                      | <b>Evening snack</b><br>1 pc apple<br>1 cup tea, 1 tbsp sugar                                                                                                                                                                                            |
| <b>Dinner</b><br>1 medium bowl white rice<br>¼ cup okra in tamarind<br>gravy<br>½ cup stir-fried cabbage<br>1 oz deep fried fish<br>1 small bowl rasam<br>1 cup tea, 1 tbsp sugar                                      | <b>Dinner</b><br>1 medium bowl white rice<br>¼ cup okra in tamarind<br>gravy<br>½ cup stir-fried cabbage<br>½ cup sambar<br>1 small bowl rasam<br>1 cup tea, 1 tbsp sugar                                                  | <b>Dinner</b><br>1 medium bowl white rice<br>¼ cup okra in tamarind<br>gravy<br>½ cup stir-fried cabbage<br>1 pc fried egg<br>1 small bowl rasam<br>1 cup tea, 1 tbsp sugar                                                | <b>Dinner</b><br>1 medium bowl white rice<br>¼ cup okra in tamarind<br>gravy<br>½ cup stir-fried cabbage<br>¼ cup sambar<br>½ cup curd<br>1 cup tea, 1 tbsp sugar                                                  | <b>Dinner</b><br>1 medium bowl white rice<br>¼ cup okra in tamarind<br>gravy<br>½ cup stir-fried cabbage<br>1 pc fried egg<br>1 cup tea, 1 tbsp sugar                                                              | <b>Dinner</b><br>1 medium bowl white rice<br>¼ cup okra in tamarind<br>gravy<br>½ cup stir-fried cabbage<br>1 oz deep fried fish<br>1 small bowl rasam<br>1 cup tea, 1 tbsp sugar                                                                        |

**DAY 2 (North Indian Menu)**

| Conventional                                                                                                                              | Vegan                                                                                                                                         | Ovo-vegetarian                                                                                                                                | Lacto-vegetarian                                                                                                                              | Lacto-ovo vegetarian                                                                                                                     | Plant-dominant                                                                                                                                 |
|-------------------------------------------------------------------------------------------------------------------------------------------|-----------------------------------------------------------------------------------------------------------------------------------------------|-----------------------------------------------------------------------------------------------------------------------------------------------|-----------------------------------------------------------------------------------------------------------------------------------------------|------------------------------------------------------------------------------------------------------------------------------------------|------------------------------------------------------------------------------------------------------------------------------------------------|
| <b>Breakfast</b><br>1 bowl vermicelli upma<br>1 cup tea, 1 tbsp sugar                                                                     | <b>Breakfast</b><br>1 bowl vermicelli upma<br>1 cup tea, 1 tbsp sugar                                                                         | <b>Breakfast</b><br>1 bowl vermicelli upma<br>1 cup tea, 1 tbsp sugar                                                                         | <b>Breakfast</b><br>1 bowl vermicelli upma<br>1 cup tea, 1 tbsp sugar                                                                         | <b>Breakfast</b><br>1 bowl vermicelli upma<br>1 cup tea, 1 tbsp sugar                                                                    | <b>Breakfast</b><br>1 bowl vermicelli upma<br>1 cup tea, 1 tbsp sugar                                                                          |
| <b>Morning snack</b><br>1 pc orange<br>1 cup tea, 1 tbsp sugar                                                                            | <b>Morning snack</b><br>1 pc orange<br>1 cup tea, 1 tbsp sugar                                                                                | <b>Morning snack</b><br>1 pc orange<br>1 cup tea, 1 tbsp sugar                                                                                | <b>Morning snack</b><br>1 pc orange<br>1 cup tea, 1 tbsp sugar                                                                                | <b>Morning snack</b><br>1 pc orange<br>1 cup tea, 1 tbsp sugar                                                                           | <b>Morning snack</b><br>1 pc orange<br>1 cup tea, 1 tbsp sugar                                                                                 |
| <b>Lunch</b><br>1 medium bowl white rice<br>1 oz masala chicken<br>½ cup okra kadai sabji<br>1 cup tea, 1 tbsp sugar                      | <b>Lunch</b><br>1 medium bowl white rice<br>½ cup masala chickpeas<br>½ cup okra kadai sabji<br>1 cup tea, 1 tbsp sugar                       | <b>Lunch</b><br>1 medium bowl white rice<br>1 pc masala egg<br>½ cup okra kadai sabji<br>1 cup tea, 1 tbsp sugar                              | <b>Lunch</b><br>1 medium bowl white rice<br>¼ cup masala paneer<br>½ cup okra kadai sabji<br>1 cup tea, 1 tbsp sugar                          | <b>Lunch</b><br>1 medium bowl white rice<br>¼ cup masala paneer<br>½ cup okra kadai sabji<br>1 cup tea, 1 tbsp sugar                     | <b>Lunch</b><br>1 medium bowl white rice<br>½ oz masala chicken<br>¼ cup masala chickpeas<br>½ cup okra kadai sabji<br>1 cup tea, 1 tbsp sugar |
| <b>Evening snack</b><br>1 slice papaya<br>1 cup tea, 1 tbsp sugar                                                                         | <b>Evening snack</b><br>1 slice papaya<br>1 cup tea, 1 tbsp sugar                                                                             | <b>Evening snack</b><br>1 slice papaya<br>1 cup tea, 1 tbsp sugar                                                                             | <b>Evening snack</b><br>1 slice papaya<br>1 cup tea, 1 tbsp sugar                                                                             | <b>Evening snack</b><br>1 slice papaya<br>1 cup tea, 1 tbsp sugar                                                                        | <b>Evening snack</b><br>1 slice papaya<br>1 cup tea, 1 tbsp sugar                                                                              |
| <b>Dinner</b><br>1 medium bowl white rice<br>1 oz chili fish<br>½ cup curry eggplant<br>½ cup okra kadai sabji<br>1 cup tea, 1 tbsp sugar | <b>Dinner</b><br>1 medium bowl white rice<br>½ cup chili lentils<br>½ cup curry eggplant<br>½ cup okra kadai sabji<br>1 cup tea, 1 tbsp sugar | <b>Dinner</b><br>1 medium bowl white rice<br>½ cup chili lentils<br>½ cup curry eggplant<br>½ cup okra kadai sabji<br>1 cup tea, 1 tbsp sugar | <b>Dinner</b><br>1 medium bowl white rice<br>½ cup chili lentils<br>½ cup curry eggplant<br>½ cup okra kadai sabji<br>1 cup tea, 1 tbsp sugar | <b>Dinner</b><br>1 medium bowl white rice<br>1 pc chili egg<br>½ cup curry eggplant<br>½ cup okra kadai sabji<br>1 cup tea, 1 tbsp sugar | <b>Dinner</b><br>1 medium bowl white rice<br>1 oz chili fish<br>½ cup curry eggplant<br>½ cup okra kadai sabji<br>1 cup tea, 1 tbsp sugar      |

### DAY 3 (South Chinese Menu)

| Conventional                                                                                                                                                      | Vegan                                                                                                                                                 | Ovo-vegetarian                                                                                                                                  | Lacto-vegetarian                                                                                                                                      | Lacto-ovo vegetarian                                                                                                                                          | Plant-dominant                                                                                                                                                    |
|-------------------------------------------------------------------------------------------------------------------------------------------------------------------|-------------------------------------------------------------------------------------------------------------------------------------------------------|-------------------------------------------------------------------------------------------------------------------------------------------------|-------------------------------------------------------------------------------------------------------------------------------------------------------|---------------------------------------------------------------------------------------------------------------------------------------------------------------|-------------------------------------------------------------------------------------------------------------------------------------------------------------------|
| <b>Breakfast</b><br>Rice noodles with pork<br>1 medium bowl rice<br>noodles<br>½ oz minced pork<br>¼ cup bok choy<br>1 cup tea, 1 tbsp sugar                      | <b>Breakfast</b><br>Rice noodles with tofu<br>1 medium bowl rice<br>noodles<br>⅔ pc tofu<br>¼ cup bok choy<br>1 cup tea, 1 tbsp sugar                 | <b>Breakfast</b><br>Rice noodles with tofu<br>1 medium bowl rice<br>noodles<br>⅔ pc tofu<br>¼ cup bok choy<br>1 cup tea, 1 tbsp sugar           | <b>Breakfast</b><br>Rice noodles with tofu<br>1 medium bowl rice<br>noodles<br>⅔ pc tofu<br>¼ cup bok choy<br>1 glass low fat milk                    | <b>Breakfast</b><br>Rice noodles with tofu<br>1 medium bowl rice<br>noodles<br>⅔ pc tofu<br>¼ cup bok choy<br>1 cup tea, 1 tbsp sugar<br>1 glass low fat milk | <b>Breakfast</b><br>Rice noodles with tofu<br>1 medium bowl rice<br>noodles<br>⅔ pc tofu<br>¼ cup bok choy<br>1 cup tea, 1 tbsp sugar                             |
| <b>Morning snack</b><br>1 pc pear<br>1 cup tea, 1 tbsp sugar                                                                                                      | <b>Morning snack</b><br>1 pc pear<br>1 cup tea, 1 tbsp sugar                                                                                          | <b>Morning snack</b><br>1 pc pear<br>1 cup tea, 1 tbsp sugar                                                                                    | <b>Morning snack</b><br>1 pc pear<br>1 cup tea, 1 tbsp sugar                                                                                          | <b>Morning snack</b><br>1 pc pear<br>1 cup tea, 1 tbsp sugar                                                                                                  | <b>Morning snack</b><br>1 pc pear<br>1 cup tea, 1 tbsp sugar                                                                                                      |
| <b>Lunch</b><br>1 medium bowl white rice<br>½ oz steamed fish<br>½ cup cucumber, stir-fried<br>1 cup tea, 1 tbsp sugar                                            | <b>Lunch</b><br>1 medium bowl white rice<br>1 pc steamed tofu<br>½ cup cucumber, stir-fried<br>1 cup tea, 1 tbsp sugar                                | <b>Lunch</b><br>1 medium bowl white rice<br>1 pc steamed tofu<br>½ cup cucumber, stir-fried<br>1 cup tea, 1 tbsp sugar                          | <b>Lunch</b><br>1 medium bowl white rice<br>½ pc steamed tofu<br>½ cup cucumber, stir-fried<br>1 cup tea, 1 tbsp sugar                                | <b>Lunch</b><br>1 medium bowl white rice<br>½ pc steamed tofu<br>½ cup cucumber, stir-fried<br>1 cup tea, 1 tbsp sugar                                        | <b>Lunch</b><br>1 medium bowl white rice<br>½ oz steamed fish<br>½ cup cucumber, stir-fried<br>1 cup tea, 1 tbsp sugar                                            |
| <b>Evening snack</b><br>1 pc apple<br>1 cup tea, 1 tbsp sugar                                                                                                     | <b>Evening snack</b><br>1 pc apple<br>1 cup tea, 1 tbsp sugar                                                                                         | <b>Evening snack</b><br>1 pc apple<br>1 cup tea, 1 tbsp sugar                                                                                   | <b>Evening snack</b><br>1 pc apple<br>1 cup tea, 1 tbsp sugar                                                                                         | <b>Evening snack</b><br>1 pc apple<br>1 cup tea, 1 tbsp sugar                                                                                                 | <b>Evening snack</b><br>1 pc apple<br>1 cup tea, 1 tbsp sugar                                                                                                     |
| <b>Dinner</b><br>1 medium bowl white rice<br>1 oz sesame oil chicken<br>sauce<br>½ cup spinach, stir-fried<br>½ cup carrot, stir-fried<br>1 cup tea, 1 tbsp sugar | <b>Dinner</b><br>1 medium bowl white rice<br>1 pc deep-fried tofu<br>½ cup carrot, stir-fried<br>½ cup spinach, stir-fried<br>1 cup tea, 1 tbsp sugar | <b>Dinner</b><br>1 medium bowl white rice<br>1 pc fried egg<br>½ cup carrot, stir-fried<br>½ cup spinach, stir-fried<br>1 cup tea, 1 tbsp sugar | <b>Dinner</b><br>1 medium bowl white rice<br>⅓ pc deep fried tofu<br>½ cup carrot, stir-fried<br>½ cup spinach, stir-fried<br>1 cup tea, 1 tbsp sugar | <b>Dinner</b><br>1 medium bowl white rice<br>1 pc fried egg<br>½ cup carrot, stir-fried<br>½ cup spinach, stir-fried<br>1 cup tea, 1 tbsp sugar               | <b>Dinner</b><br>1 medium bowl white rice<br>1 oz sesame oil chicken<br>sauce<br>½ cup carrot, stir-fried<br>½ cup spinach, stir-fried<br>1 cup tea, 1 tbsp sugar |

\*Sugar may be replaced with honey, syrup, candies, or jam as other food choices.

Sample Menu for Low Protein Diet (LPD) – 2100 kcal, 0.6 g/kg/d or 42 g/d protein  
**DAY 1 (South Indian Menu)**

| Conventional                                                                                                                                                                                                           | Vegan                                                                                                                                                                                                                      | Ovo-vegetarian                                                                                                                                                                                                             | Lacto-vegetarian                                                                                                                                                                                                   | Lacto-ovo vegetarian                                                                                                                                                                                               | Plant-dominant                                                                                                                                                                                                                                           |
|------------------------------------------------------------------------------------------------------------------------------------------------------------------------------------------------------------------------|----------------------------------------------------------------------------------------------------------------------------------------------------------------------------------------------------------------------------|----------------------------------------------------------------------------------------------------------------------------------------------------------------------------------------------------------------------------|--------------------------------------------------------------------------------------------------------------------------------------------------------------------------------------------------------------------|--------------------------------------------------------------------------------------------------------------------------------------------------------------------------------------------------------------------|----------------------------------------------------------------------------------------------------------------------------------------------------------------------------------------------------------------------------------------------------------|
| <b>Breakfast</b><br>2 pc dosa<br>2 tbsp curry gravy<br>1 cup tea, 1 tbsp sugar                                                                                                                                         | <b>Breakfast</b><br>2 pc dosa<br>2 tbsp curry gravy<br>1 cup tea, 1 tbsp sugar                                                                                                                                             | <b>Breakfast</b><br>2 pc dosa<br>2 tbsp curry gravy<br>1 cup tea, 1 tbsp sugar                                                                                                                                             | <b>Breakfast</b><br>2 pc dosa<br>2 tbsp curry gravy<br>1 cup tea, 1 tbsp sugar                                                                                                                                     | <b>Breakfast</b><br>2 pc dosa<br>2 tbsp curry gravy<br>1 cup tea, 1 tbsp sugar                                                                                                                                     | <b>Breakfast</b><br>2 pc dosa<br>2 tbsp curry gravy<br>1 cup tea, 1 tbsp sugar                                                                                                                                                                           |
| <b>Morning snack</b><br>½ pc mango<br>1 cup tea, 1 tbsp sugar                                                                                                                                                          | <b>Morning snack</b><br>½ pc mango                                                                                                                                                                                         | <b>Morning snack</b><br>½ pc mango                                                                                                                                                                                         | <b>Morning snack</b><br>½ pc mango<br>1 cup tea, 1 tbsp sugar                                                                                                                                                      | <b>Morning snack</b><br>½ pc mango<br>1 cup tea, 1 tbsp sugar                                                                                                                                                      | <b>Morning snack</b><br>½ pc mango<br>1 cup tea, 1 tbsp sugar                                                                                                                                                                                            |
| <b>Lunch</b><br>1 medium bowl white rice<br>¼ cup okra in tamarind<br>gravy<br>¼ cup french beans &<br>carrot<br>Chicken curry:<br>1 oz chicken<br>2 tbsp curry gravy<br>1 small bowl rasam<br>1 cup tea, 1 tbsp sugar | <b>Lunch</b><br>1 medium bowl white rice<br>¼ cup okra in tamarind<br>gravy<br>¼ cup french beans &<br>carrot<br>Chickpeas curry:<br>1 cup chickpea<br>2 tbsp curry gravy<br>1 small bowl rasam<br>1 cup tea, 1 tbsp sugar | <b>Lunch</b><br>1 medium bowl white rice<br>¼ cup okra in tamarind<br>gravy<br>¼ cup french beans &<br>carrot<br>Chickpeas curry:<br>½ cup chickpea<br>2 tbsp curry gravy<br>1 small bowl rasam<br>1 cup tea, 1 tbsp sugar | <b>Lunch</b><br>1 medium bowl white rice<br>¼ cup okra in tamarind<br>gravy<br>¼ cup french beans &<br>carrot<br>Chickpeas curry:<br>½ cup chickpea<br>2 tbsp curry gravy<br>1 cup curd<br>1 cup tea, 1 tbsp sugar | <b>Lunch</b><br>1 medium bowl white rice<br>¼ cup okra in tamarind<br>gravy<br>¼ cup french beans &<br>carrot<br>Chickpeas curry:<br>¼ cup chickpea<br>2 tbsp curry gravy<br>1 cup curd<br>1 cup tea, 1 tbsp sugar | <b>Lunch</b><br>1 medium bowl white rice<br>¼ cup okra in tamarind<br>gravy<br>¼ cup french beans &<br>carrot<br>Chicken and chickpea<br>curry:<br>1 oz chicken<br>½ cup chickpea<br>2 tbsp curry gravy<br>1 small bowl rasam<br>1 cup tea, 1 tbsp sugar |
| <b>Evening snack</b><br>1 pc apple<br>1 cup tea, 1 tbsp sugar                                                                                                                                                          | <b>Evening snack</b><br>1 pc apple<br>1 cup tea, 1 tbsp sugar                                                                                                                                                              | <b>Evening snack</b><br>1 pc apple<br>1 cup tea, 1 tbsp sugar                                                                                                                                                              | <b>Evening snack</b><br>1 pc apple<br>1 cup tea, 1 tbsp sugar                                                                                                                                                      | <b>Evening snack</b><br>1 pc apple<br>1 cup tea, 1 tbsp sugar                                                                                                                                                      | <b>Evening snack</b><br>1 pc apple<br>1 cup tea, 1 tbsp sugar                                                                                                                                                                                            |
| <b>Dinner</b><br>1 medium bowl white rice<br>¼ cup okra in tamarind<br>gravy<br>½ cup stir-fried cabbage<br>2 oz deep fried fish<br>1 small bowl rasam<br>1 cup tea, 1 tbsp sugar                                      | <b>Dinner</b><br>1 medium bowl white rice<br>¼ cup okra in tamarind<br>gravy<br>½ cup stir-fried cabbage<br>½ cup sambar<br>1 small bowl rasam<br>1 cup tea, 1 tbsp sugar                                                  | <b>Dinner</b><br>1 medium bowl white rice<br>¼ cup okra in tamarind<br>gravy<br>½ cup stir-fried cabbage<br>2 pc fried egg<br>1 small bowl rasam<br>1 cup tea, 1 tbsp sugar                                                | <b>Dinner</b><br>1 medium bowl white rice<br>¼ cup okra in tamarind<br>gravy<br>½ cup stir-fried cabbage<br>¼ cup sambar<br>½ cup curd<br>1 cup tea, 1 tbsp sugar                                                  | <b>Dinner</b><br>1 medium bowl white rice<br>¼ cup okra in tamarind<br>gravy<br>½ cup stir-fried cabbage<br>2 pc fried egg<br>1 small bowl rasam<br>1 cup tea, 1 tbsp sugar                                        | <b>Dinner</b><br>1 medium bowl white rice<br>¼ cup okra in tamarind<br>gravy<br>½ cup stir-fried cabbage<br>1 oz deep fried fish<br>1 small bowl rasam<br>1 cup tea, 1 tbsp sugar                                                                        |

**DAY 2 (North Indian Menu)**

| Conventional                                                                                                                              | Vegan                                                                                                                                         | Ovo-vegetarian                                                                                                                                | Lacto-vegetarian                                                                                                                              | Lacto-ovo vegetarian                                                                                                                     | Plant-dominant                                                                                                                                 |
|-------------------------------------------------------------------------------------------------------------------------------------------|-----------------------------------------------------------------------------------------------------------------------------------------------|-----------------------------------------------------------------------------------------------------------------------------------------------|-----------------------------------------------------------------------------------------------------------------------------------------------|------------------------------------------------------------------------------------------------------------------------------------------|------------------------------------------------------------------------------------------------------------------------------------------------|
| <b>Breakfast</b><br>1 bowl vermicelli upma<br>1 cup tea, 1 tbsp sugar                                                                     | <b>Breakfast</b><br>1 bowl vermicelli upma<br>1 cup tea, 1 tbsp sugar                                                                         | <b>Breakfast</b><br>1 bowl vermicelli upma<br>1 cup tea, 1 tbsp sugar                                                                         | <b>Breakfast</b><br>1 bowl vermicelli upma<br>1 cup tea, 1 tbsp sugar                                                                         | <b>Breakfast</b><br>1 bowl vermicelli upma<br>1 cup tea, 1 tbsp sugar                                                                    | <b>Breakfast</b><br>1 bowl vermicelli upma<br>1 cup tea, 1 tbsp sugar                                                                          |
| <b>Morning snack</b><br>1 pc orange<br>1 cup tea, 1 tbsp sugar                                                                            | <b>Morning snack</b><br>1 pc orange                                                                                                           | <b>Morning snack</b><br>1 pc orange                                                                                                           | <b>Morning snack</b><br>1 pc orange                                                                                                           | <b>Morning snack</b><br>1 pc orange<br>1 cup tea, 1 tbsp sugar                                                                           | <b>Morning snack</b><br>1 pc orange<br>1 cup tea, 1 tbsp sugar                                                                                 |
| <b>Lunch</b><br>1 medium bowl white rice<br>1 oz masala chicken<br>½ cup okra kadai sabji<br>1 cup tea, 1 tbsp sugar                      | <b>Lunch</b><br>1 medium bowl white rice<br>½ cup masala chickpeas<br>½ cup okra kadai sabji<br>1 cup tea, 1 tbsp sugar                       | <b>Lunch</b><br>1 medium bowl white rice<br>2 pc masala egg<br>½ cup okra kadai sabji<br>1 cup tea, 1 tbsp sugar                              | <b>Lunch</b><br>1 medium bowl white rice<br>½ cup masala paneer<br>½ cup okra kadai sabji<br>1 cup tea, 1 tbsp sugar                          | <b>Lunch</b><br>1 medium bowl white rice<br>¼ cup masala paneer<br>½ cup okra kadai sabji<br>1 cup tea, 1 tbsp sugar                     | <b>Lunch</b><br>1 medium bowl white rice<br>1 oz masala chicken<br>½ cup masala chickpeas<br>½ cup okra kadai sabji<br>1 cup tea, 1 tbsp sugar |
| <b>Evening snack</b><br>1 slice papaya<br>1 cup tea, 1 tbsp sugar                                                                         | <b>Evening snack</b><br>1 slice papaya<br>1 cup tea, 1 tbsp sugar                                                                             | <b>Evening snack</b><br>1 slice papaya<br>1 cup tea, 1 tbsp sugar                                                                             | <b>Evening snack</b><br>1 slice papaya<br>1 cup tea, 1 tbsp sugar                                                                             | <b>Evening snack</b><br>1 slice papaya<br>1 cup tea, 1 tbsp sugar                                                                        | <b>Evening snack</b><br>1 slice papaya<br>1 cup tea, 1 tbsp sugar                                                                              |
| <b>Dinner</b><br>1 medium bowl white rice<br>2 oz chili fish<br>½ cup curry eggplant<br>½ cup okra kadai sabji<br>1 cup tea, 1 tbsp sugar | <b>Dinner</b><br>1 medium bowl white rice<br>1 cup chili lentils<br>½ cup curry eggplant<br>½ cup okra kadai sabji<br>1 cup tea, 1 tbsp sugar | <b>Dinner</b><br>1 medium bowl white rice<br>½ cup chili lentils<br>½ cup curry eggplant<br>½ cup okra kadai sabji<br>1 cup tea, 1 tbsp sugar | <b>Dinner</b><br>1 medium bowl white rice<br>½ cup chili lentils<br>½ cup curry eggplant<br>½ cup okra kadai sabji<br>1 cup tea, 1 tbsp sugar | <b>Dinner</b><br>1 medium bowl white rice<br>2 pc chili egg<br>½ cup curry eggplant<br>½ cup okra kadai sabji<br>1 cup tea, 1 tbsp sugar | <b>Dinner</b><br>1 medium bowl white rice<br>1 oz chili fish<br>½ cup curry eggplant<br>½ cup okra kadai sabji<br>1 cup tea, 1 tbsp sugar      |

**DAY 3 (South Chinese Menu)**

| Conventional                                                                                                                                                      | Vegan                                                                                                                                                 | Ovo-vegetarian                                                                                                                                  | Lacto-vegetarian                                                                                                                                      | Lacto-ovo vegetarian                                                                                                                            | Plant-dominant                                                                                                                                        |
|-------------------------------------------------------------------------------------------------------------------------------------------------------------------|-------------------------------------------------------------------------------------------------------------------------------------------------------|-------------------------------------------------------------------------------------------------------------------------------------------------|-------------------------------------------------------------------------------------------------------------------------------------------------------|-------------------------------------------------------------------------------------------------------------------------------------------------|-------------------------------------------------------------------------------------------------------------------------------------------------------|
| <b>Breakfast</b><br>Rice noodles with pork<br>1 medium bowl rice<br>noodles<br>½ oz minced pork<br>¼ cup bok choy<br>1 cup tea, 1 tbsp sugar                      | <b>Breakfast</b><br>Rice noodles with tofu<br>1 medium bowl rice<br>noodles<br>1 pc tofu<br>¼ cup bok choy<br>1 cup tea, 1 tbsp sugar                 | <b>Breakfast</b><br>Rice noodles with tofu<br>1 medium bowl rice<br>noodles<br>⅔ pc tofu<br>¼ cup bok choy<br>1 cup tea, 1 tbsp sugar           | <b>Breakfast</b><br>Rice noodles with tofu<br>1 medium bowl rice<br>noodles<br>⅔ pc tofu<br>¼ cup bok choy<br>1 glass low fat milk                    | <b>Breakfast</b><br>Rice noodles with tofu<br>1 medium bowl rice<br>noodles<br>⅔ pc tofu<br>¼ cup bok choy<br>1 glass low fat milk              | <b>Breakfast</b><br>Rice noodles with tofu<br>1 medium bowl rice<br>noodles<br>1 pc tofu<br>¼ cup bok choy<br>1 cup tea, 1 tbsp sugar                 |
| <b>Morning snack</b><br>1 pc pear<br>1 cup tea, 1 tbsp sugar                                                                                                      | <b>Morning snack</b><br>1 pc pear                                                                                                                     | <b>Morning snack</b><br>1 pc pear                                                                                                               | <b>Morning snack</b><br>1 pc pear<br>1 cup tea, 1 tbsp sugar                                                                                          | <b>Morning snack</b><br>1 pc pear<br>1 cup tea, 1 tbsp sugar                                                                                    | <b>Morning snack</b><br>1 pc pear<br>1 cup tea, 1 tbsp sugar                                                                                          |
| <b>Lunch</b><br>1 medium bowl white rice<br>1½ oz steamed fish<br>½ cup cucumber, stir-fried<br>1 cup tea, 1 tbsp sugar                                           | <b>Lunch</b><br>1 medium bowl white rice<br>1 pc steamed tofu<br>½ cup cucumber, stir-fried<br>1 cup tea, 1 tbsp sugar                                | <b>Lunch</b><br>1 medium bowl white rice<br>1 pc steamed tofu<br>½ cup cucumber, stir-fried<br>1 cup tea, 1 tbsp sugar                          | <b>Lunch</b><br>1 medium bowl white rice<br>1 pc steamed tofu<br>½ cup cucumber, stir-fried<br>1 cup tea, 1 tbsp sugar                                | <b>Lunch</b><br>1 medium bowl white rice<br>⅓ pc steamed tofu<br>½ cup cucumber, stir-fried<br>1 cup tea, 1 tbsp sugar                          | <b>Lunch</b><br>1 medium bowl white rice<br>1 oz steamed fish<br>½ cup cucumber, stir-fried<br>1 cup tea, 1 tbsp sugar                                |
| <b>Evening snack</b><br>1 pc apple<br>1 cup tea, 1 tbsp sugar                                                                                                     | <b>Evening snack</b><br>1 pc apple<br>1 cup tea, 1 tbsp sugar                                                                                         | <b>Evening snack</b><br>1 pc apple<br>1 cup tea, 1 tbsp sugar                                                                                   | <b>Evening snack</b><br>1 pc apple<br>1 cup tea, 1 tbsp sugar                                                                                         | <b>Evening snack</b><br>1 pc apple<br>1 cup tea, 1 tbsp sugar                                                                                   | <b>Evening snack</b><br>1 pc apple<br>1 cup tea, 1 tbsp sugar                                                                                         |
| <b>Dinner</b><br>1 medium bowl white rice<br>1 oz sesame oil chicken<br>sauce<br>½ cup carrot, stir-fried<br>½ cup spinach, stir-fried<br>1 cup tea, 1 tbsp sugar | <b>Dinner</b><br>1 medium bowl white rice<br>3 oz deep fried tofu<br>½ cup carrot, stir-fried<br>½ cup spinach, stir-fried<br>1 cup tea, 1 tbsp sugar | <b>Dinner</b><br>1 medium bowl white rice<br>2 pc fried egg<br>½ cup carrot, stir-fried<br>½ cup spinach, stir-fried<br>1 cup tea, 1 tbsp sugar | <b>Dinner</b><br>1 medium bowl white rice<br>⅔ pc deep fried tofu<br>½ cup carrot, stir-fried<br>½ cup spinach, stir-fried<br>1 cup tea, 1 tbsp sugar | <b>Dinner</b><br>1 medium bowl white rice<br>2 pc fried egg<br>½ cup carrot, stir-fried<br>½ cup spinach, stir-fried<br>1 cup tea, 1 tbsp sugar | <b>Dinner</b><br>1 medium bowl white rice<br>3 oz deep fried tofu<br>½ cup carrot, stir-fried<br>½ cup spinach, stir-fried<br>1 cup tea, 1 tbsp sugar |

\*Sugar may be replaced with honey, syrup, candies, or jam as other food choices.

Sample Menu for Low Protein Diet (LPD) – 2100 kcal, 0.7 g/kg/d or 49 g/d protein  
**DAY 1 (South Indian Menu)**

| Conventional                                                                                                                                                                                                           | Vegan                                                                                                                                                                                                                      | Ovo-vegetarian                                                                                                                                                                                                             | Lacto-vegetarian                                                                                                                                                                                                   | Lacto-ovo vegetarian                                                                                                                                                                                               | Plant-dominant                                                                                                                                                                                                                                           |
|------------------------------------------------------------------------------------------------------------------------------------------------------------------------------------------------------------------------|----------------------------------------------------------------------------------------------------------------------------------------------------------------------------------------------------------------------------|----------------------------------------------------------------------------------------------------------------------------------------------------------------------------------------------------------------------------|--------------------------------------------------------------------------------------------------------------------------------------------------------------------------------------------------------------------|--------------------------------------------------------------------------------------------------------------------------------------------------------------------------------------------------------------------|----------------------------------------------------------------------------------------------------------------------------------------------------------------------------------------------------------------------------------------------------------|
| <b>Breakfast</b><br>2 pc dosa<br>2 tbsp curry gravy<br>1 cup tea, 1 tbsp sugar                                                                                                                                         | <b>Breakfast</b><br>2 pc dosa<br>2 tbsp curry gravy<br>1 cup tea, 1 tbsp sugar                                                                                                                                             | <b>Breakfast</b><br>2 pc dosa<br>2 tbsp curry gravy<br>1 cup tea, 1 tbsp sugar                                                                                                                                             | <b>Breakfast</b><br>2 pc dosa<br>2 tbsp curry gravy<br>1 cup tea, 1 tbsp sugar                                                                                                                                     | <b>Breakfast</b><br>2 pc dosa<br>2 tbsp curry gravy<br>1 cup tea, 1 tbsp sugar                                                                                                                                     | <b>Breakfast</b><br>2 pc dosa<br>2 tbsp curry gravy<br>1 cup tea, 1 tbsp sugar                                                                                                                                                                           |
| <b>Morning snack</b><br>½ pc mango                                                                                                                                                                                     | <b>Morning snack</b><br>½ pc mango                                                                                                                                                                                         | <b>Morning snack</b><br>½ pc mango                                                                                                                                                                                         | <b>Morning snack</b><br>½ pc mango                                                                                                                                                                                 | <b>Morning snack</b><br>½ pc mango                                                                                                                                                                                 | <b>Morning snack</b><br>½ pc mango                                                                                                                                                                                                                       |
| <b>Lunch</b><br>1 medium bowl white rice<br>¼ cup okra in tamarind<br>gravy<br>¼ cup french beans &<br>carrot<br>Chicken curry:<br>2 oz chicken<br>2 tbsp curry gravy<br>1 small bowl rasam<br>1 cup tea, 1 tbsp sugar | <b>Lunch</b><br>1 medium bowl white rice<br>¼ cup okra in tamarind<br>gravy<br>¼ cup french beans &<br>carrot<br>Chickpeas curry:<br>1 cup chickpea<br>2 tbsp curry gravy<br>1 small bowl rasam<br>1 cup tea, 1 tbsp sugar | <b>Lunch</b><br>1 medium bowl white rice<br>¼ cup okra in tamarind<br>gravy<br>¼ cup french beans &<br>carrot<br>Chickpeas curry:<br>1 cup chickpea<br>2 tbsp curry gravy<br>1 small bowl rasam<br>1 cup tea, 1 tbsp sugar | <b>Lunch</b><br>1 medium bowl white rice<br>¼ cup okra in tamarind<br>gravy<br>¼ cup french beans &<br>carrot<br>Chickpeas curry:<br>1 cup chickpea<br>2 tbsp curry gravy<br>1 cup curd<br>1 cup tea, 1 tbsp sugar | <b>Lunch</b><br>1 medium bowl white rice<br>¼ cup okra in tamarind<br>gravy<br>¼ cup french beans &<br>carrot<br>Chickpeas curry:<br>½ cup chickpea<br>2 tbsp curry gravy<br>½ cup curd<br>1 cup tea, 1 tbsp sugar | <b>Lunch</b><br>1 medium bowl white rice<br>¼ cup okra in tamarind<br>gravy<br>¼ cup french beans &<br>carrot<br>Chicken and chickpea<br>curry:<br>1 oz chicken<br>1 cup chickpea<br>2 tbsp curry gravy<br>1 small bowl rasam<br>1 cup tea, 1 tbsp sugar |
| <b>Evening snack</b><br>1 pc apple<br>1 cup tea, 1 tbsp sugar                                                                                                                                                          | <b>Evening snack</b><br>1 pc apple                                                                                                                                                                                         | <b>Evening snack</b><br>1 pc apple                                                                                                                                                                                         | <b>Evening snack</b><br>1 pc apple                                                                                                                                                                                 | <b>Evening snack</b><br>1 pc apple<br>1 cup tea, 1 tbsp sugar                                                                                                                                                      | <b>Evening snack</b><br>1 pc apple<br>1 cup tea, 1 tbsp sugar                                                                                                                                                                                            |
| <b>Dinner</b><br>1 medium bowl white rice<br>¼ cup okra in tamarind<br>gravy<br>½ cup stir-fried cabbage<br>1 cup sambar<br>2 oz deep fried fish<br>1 small bowl rasam<br>1 cup tea, 1 tbsp sugar                      | <b>Dinner</b><br>1 medium bowl white rice<br>¼ cup okra in tamarind<br>gravy<br>½ cup stir-fried cabbage<br>1 cup sambar<br>1 small bowl rasam<br>1 cup tea, 1 tbsp sugar                                                  | <b>Dinner</b><br>1 medium bowl white rice<br>¼ cup okra in tamarind<br>gravy<br>½ cup stir-fried cabbage<br>2 pc fried egg<br>1 small bowl rasam<br>1 cup tea, 1 tbsp sugar                                                | <b>Dinner</b><br>1 medium bowl white rice<br>¼ cup okra in tamarind<br>gravy<br>½ cup stir-fried cabbage<br>¼ cup sambar<br>½ cup curd<br>1 cup tea, 1 tbsp sugar                                                  | <b>Dinner</b><br>1 medium bowl white rice<br>¼ cup okra in tamarind<br>gravy<br>½ cup stir-fried cabbage<br>2 pc fried egg<br>½ cup curd<br>1 cup tea, 1 tbsp sugar                                                | <b>Dinner</b><br>1 medium bowl white rice<br>¼ cup okra in tamarind<br>gravy<br>½ cup stir-fried cabbage<br>1 oz deep fried fish<br>1 small bowl rasam<br>1 cup tea, 1 tbsp sugar                                                                        |

**DAY 2 (North Indian Menu)**

| Conventional                                                                                                                              | Vegan                                                                                                                                         | Ovo-vegetarian                                                                                                                                | Lacto-vegetarian                                                                                                                              | Lacto-ovo vegetarian                                                                                                                     | Plant-dominant                                                                                                                                 |
|-------------------------------------------------------------------------------------------------------------------------------------------|-----------------------------------------------------------------------------------------------------------------------------------------------|-----------------------------------------------------------------------------------------------------------------------------------------------|-----------------------------------------------------------------------------------------------------------------------------------------------|------------------------------------------------------------------------------------------------------------------------------------------|------------------------------------------------------------------------------------------------------------------------------------------------|
| <b>Breakfast</b><br>1 bowl vermicelli upma<br>1 cup tea, 1 tbsp sugar                                                                     | <b>Breakfast</b><br>1 bowl vermicelli upma<br>1 cup tea, 1 tbsp sugar                                                                         | <b>Breakfast</b><br>1 bowl vermicelli upma<br>1 cup tea, 1 tbsp sugar                                                                         | <b>Breakfast</b><br>1 bowl vermicelli upma<br>1 cup tea, 1 tbsp sugar                                                                         | <b>Breakfast</b><br>1 bowl vermicelli upma<br>1 cup tea, 1 tbsp sugar                                                                    | <b>Breakfast</b><br>1 bowl vermicelli upma<br>1 cup tea, 1 tbsp sugar                                                                          |
| <b>Morning snack</b><br>1 pc orange<br>1 cup tea, 1 tbsp sugar                                                                            | <b>Morning snack</b><br>1 pc orange                                                                                                           | <b>Morning snack</b><br>1 pc orange                                                                                                           | <b>Morning snack</b><br>1 pc orange                                                                                                           | <b>Morning snack</b><br>1 pc orange                                                                                                      | <b>Morning snack</b><br>1 pc orange                                                                                                            |
| <b>Lunch</b><br>1 medium bowl white rice<br>2 oz masala chicken<br>½ cup okra kadai sabji<br>1 cup tea, 1 tbsp sugar                      | <b>Lunch</b><br>1 medium bowl white rice<br>1 cup masala chickpeas<br>½ cup okra kadai sabji<br>1 cup tea, 1 tbsp sugar                       | <b>Lunch</b><br>1 medium bowl white rice<br>2 pc masala egg<br>½ cup okra kadai sabji<br>1 cup tea, 1 tbsp sugar                              | <b>Lunch</b><br>1 medium bowl white rice<br>½ cup masala paneer<br>½ cup okra kadai sabji<br>1 cup tea, 1 tbsp sugar                          | <b>Lunch</b><br>1 medium bowl white rice<br>½ cup masala paneer<br>½ cup okra kadai sabji<br>1 cup tea, 1 tbsp sugar                     | <b>Lunch</b><br>1 medium bowl white rice<br>1 oz masala chicken<br>1 cup masala chickpeas<br>½ cup okra kadai sabji<br>1 cup tea, 1 tbsp sugar |
| <b>Evening snack</b><br>1 slice papaya<br>1 cup tea, 1 tbsp sugar                                                                         | <b>Evening snack</b><br>1 slice papaya                                                                                                        | <b>Evening snack</b><br>1 slice papaya                                                                                                        | <b>Evening snack</b><br>1 slice papaya                                                                                                        | <b>Evening snack</b><br>1 slice papaya<br>1 cup tea, 1 tbsp sugar                                                                        | <b>Evening snack</b><br>1 slice papaya<br>1 cup tea, 1 tbsp sugar                                                                              |
| <b>Dinner</b><br>1 medium bowl white rice<br>2 oz chili fish<br>½ cup curry eggplant<br>½ cup okra kadai sabji<br>1 cup tea, 1 tbsp sugar | <b>Dinner</b><br>1 medium bowl white rice<br>1 cup chili lentils<br>½ cup curry eggplant<br>½ cup okra kadai sabji<br>1 cup tea, 1 tbsp sugar | <b>Dinner</b><br>1 medium bowl white rice<br>1 cup chili lentils<br>½ cup curry eggplant<br>½ cup okra kadai sabji<br>1 cup tea, 1 tbsp sugar | <b>Dinner</b><br>1 medium bowl white rice<br>1 cup chili lentils<br>½ cup curry eggplant<br>½ cup okra kadai sabji<br>1 cup tea, 1 tbsp sugar | <b>Dinner</b><br>1 medium bowl white rice<br>2 pc chili egg<br>½ cup curry eggplant<br>½ cup okra kadai sabji<br>1 cup tea, 1 tbsp sugar | <b>Dinner</b><br>1 medium bowl white rice<br>1 oz chili fish<br>½ cup curry eggplant<br>½ cup okra kadai sabji<br>1 cup tea, 1 tbsp sugar      |



**DAY 3 (South Chinese Menu)**

| Conventional                                                                                                                                                       | Vegan                                                                                                                                                  | Ovo-vegetarian                                                                                                                                  | Lacto-vegetarian                                                                                                                                      | Lacto-ovo vegetarian                                                                                                                            | Plant-dominant                                                                                                                                                                            |
|--------------------------------------------------------------------------------------------------------------------------------------------------------------------|--------------------------------------------------------------------------------------------------------------------------------------------------------|-------------------------------------------------------------------------------------------------------------------------------------------------|-------------------------------------------------------------------------------------------------------------------------------------------------------|-------------------------------------------------------------------------------------------------------------------------------------------------|-------------------------------------------------------------------------------------------------------------------------------------------------------------------------------------------|
| <b>Breakfast</b><br>Rice noodles with pork<br>1 medium bowl rice<br>noodles<br>½ oz minced pork<br>¼ cup bok choy<br>1 cup tea, 1 tbsp sugar                       | <b>Breakfast</b><br>Rice noodles with tofu<br>1 medium bowl rice<br>noodles<br>1⅓ pc tofu<br>¼ cup bok choy<br>1 cup tea, 1 tbsp sugar                 | <b>Breakfast</b><br>Rice noodles with tofu<br>1 medium bowl rice<br>noodles<br>1 pc tofu<br>¼ cup bok choy<br>1 cup tea, 1 tbsp sugar           | <b>Breakfast</b><br>Rice noodles with tofu<br>1 medium bowl rice<br>noodles<br>⅔ pc tofu<br>¼ cup bok choy<br>1 glass low fat milk                    | <b>Breakfast</b><br>Rice noodles with tofu<br>1 medium bowl rice<br>noodles<br>⅔ pc tofu<br>¼ cup bok choy<br>1 glass low fat milk              | <b>Breakfast</b><br>Rice noodles with tofu<br>1 medium bowl rice<br>noodles<br>1 pc tofu<br>¼ cup bok choy<br>1 cup tea, 1 tbsp sugar                                                     |
| <b>Morning snack</b><br>1 pc pear<br>1 cup tea, 1 tbsp sugar                                                                                                       | <b>Morning snack</b><br>1 pc pear                                                                                                                      | <b>Morning snack</b><br>1 pc pear                                                                                                               | <b>Morning snack</b><br>1 pc pear<br>½ glass low fat milk                                                                                             | <b>Morning snack</b><br>1 pc pear<br>½ glass low fat milk                                                                                       | <b>Morning snack</b><br>1 pc pear                                                                                                                                                         |
| <b>Lunch</b><br>1 medium bowl white rice<br>1½ oz steamed fish<br>½ cup cucumber, stir-fried<br>1 cup tea, 1 tbsp sugar                                            | <b>Lunch</b><br>1 medium bowl white rice<br>1⅓ pc steamed tofu<br>½ cup cucumber, stir-fried<br>1 cup tea, 1 tbsp sugar                                | <b>Lunch</b><br>1 medium bowl white rice<br>1⅓ pc steamed tofu<br>½ cup cucumber, stir-fried<br>1 cup tea, 1 tbsp sugar                         | <b>Lunch</b><br>1 medium bowl white rice<br>3 oz steamed tofu<br>½ cup cucumber, stir-fried<br>1 cup tea, 1 tbsp sugar                                | <b>Lunch</b><br>1 medium bowl white rice<br>1 oz steamed tofu<br>½ cup cucumber, stir-fried<br>1 cup tea, 1 tbsp sugar                          | <b>Lunch</b><br>1 medium bowl white rice<br>1 oz steamed fish<br>½ cup cucumber, stir-fried<br>1 cup tea, 1 tbsp sugar                                                                    |
| <b>Evening snack</b><br>1 pc apple<br>1 cup tea, 1 tbsp sugar                                                                                                      | <b>Evening snack</b><br>1 pc apple                                                                                                                     | <b>Evening snack</b><br>1 pc apple                                                                                                              | <b>Evening snack</b><br>1 pc apple<br>½ glass low fat milk                                                                                            | <b>Evening snack</b><br>1 pc apple<br>½ glass low fat milk                                                                                      | <b>Evening snack</b><br>1 pc apple<br>1 cup tea, 1 tbsp sugar                                                                                                                             |
| <b>Dinner</b><br>1 medium bowl white rice<br>1½ oz sesame oil chicken<br>sauce<br>½ cup carrot, stir-fried<br>½ cup spinach, stir-fried<br>1 cup tea, 1 tbsp sugar | <b>Dinner</b><br>1 medium bowl white rice<br>1⅓ pc deep fried tofu<br>½ cup carrot, stir-fried<br>½ cup spinach, stir-fried<br>1 cup tea, 1 tbsp sugar | <b>Dinner</b><br>1 medium bowl white rice<br>2 pc fried egg<br>½ cup carrot, stir-fried<br>½ cup spinach, stir-fried<br>1 cup tea, 1 tbsp sugar | <b>Dinner</b><br>1 medium bowl white rice<br>⅓ pc deep fried tofu<br>½ cup carrot, stir-fried<br>½ cup spinach, stir-fried<br>1 cup tea, 1 tbsp sugar | <b>Dinner</b><br>1 medium bowl white rice<br>2 pc fried egg<br>½ cup carrot, stir-fried<br>½ cup spinach, stir-fried<br>1 cup tea, 1 tbsp sugar | <b>Dinner</b><br>1 medium bowl white rice<br>1 pc deep fried tofu<br>1 oz sesame oil chicken<br>sauce<br>½ cup carrot, stir-fried<br>½ cup spinach, stir-fried<br>1 cup tea, 1 tbsp sugar |

\*Sugar may be replaced with honey, syrup, candies, or jam as other food choices.

Sample Menu for Low Protein Diet (LPD) – 2100 kcal, 0.8 g/kg/d or 56 g/d protein  
**DAY 1 (South Indian Menu)**

| Conventional                                                                                                                                                                                                           | Vegan                                                                                                                                                                                            | Ovo-vegetarian                                                                                                                                                                                  | Lacto-vegetarian                                                                                                                                                                        | Lacto-ovo vegetarian                                                                                                                                                                    | Plant-dominant                                                                                                                                                                                                                |
|------------------------------------------------------------------------------------------------------------------------------------------------------------------------------------------------------------------------|--------------------------------------------------------------------------------------------------------------------------------------------------------------------------------------------------|-------------------------------------------------------------------------------------------------------------------------------------------------------------------------------------------------|-----------------------------------------------------------------------------------------------------------------------------------------------------------------------------------------|-----------------------------------------------------------------------------------------------------------------------------------------------------------------------------------------|-------------------------------------------------------------------------------------------------------------------------------------------------------------------------------------------------------------------------------|
| <b>Breakfast</b><br>2 pc dosa<br>2 tbsp curry gravy<br>1 cup tea, 1 tbsp sugar                                                                                                                                         | <b>Breakfast</b><br>2 pc dosa<br>2 tbsp curry gravy<br>1 cup tea, 1 tbsp sugar                                                                                                                   | <b>Breakfast</b><br>2 pc dosa<br>2 tbsp curry gravy<br>1 cup tea, 1 tbsp sugar                                                                                                                  | <b>Breakfast</b><br>2 pc dosa<br>2 tbsp curry gravy<br>1 cup tea, 1 tbsp sugar                                                                                                          | <b>Breakfast</b><br>2 pc dosa<br>2 tbsp curry gravy<br>1 cup tea, 1 tbsp sugar                                                                                                          | <b>Breakfast</b><br>2 pc dosa<br>2 tbsp curry gravy<br>1 cup tea, 1 tbsp sugar                                                                                                                                                |
| <b>Morning snack</b><br>½ pc mango                                                                                                                                                                                     | <b>Morning snack</b><br>½ pc mango                                                                                                                                                               | <b>Morning snack</b><br>½ pc mango                                                                                                                                                              | <b>Morning snack</b><br>½ pc mango                                                                                                                                                      | <b>Morning snack</b><br>½ pc mango                                                                                                                                                      | <b>Morning snack</b><br>½ pc mango                                                                                                                                                                                            |
| <b>Lunch</b><br>1 medium bowl white rice<br>¼ cup okra in tamarind<br>gravy<br>¼ cup french beans &<br>carrot<br>Chicken curry:<br>2 oz chicken<br>2 tbsp curry gravy<br>1 small bowl rasam<br>1 cup tea, 1 tbsp sugar | <b>Lunch</b><br>1 medium bowl white rice<br>¼ cup okra in tamarind<br>gravy<br>¼ cup french beans &<br>carrot<br>Chickpeas curry:<br>1½ cup chickpea<br>2 tbsp curry gravy<br>1 small bowl rasam | <b>Lunch</b><br>1 medium bowl white rice<br>¼ cup okra in tamarind<br>gravy<br>¼ cup french beans &<br>carrot<br>Chickpeas curry:<br>1 cup chickpea<br>2 tbsp curry gravy<br>1 small bowl rasam | <b>Lunch</b><br>1 medium bowl white rice<br>¼ cup okra in tamarind<br>gravy<br>¼ cup french beans &<br>carrot<br>Chickpeas curry:<br>1 cup chickpea<br>2 tbsp curry gravy<br>1 cup curd | <b>Lunch</b><br>1 medium bowl white rice<br>¼ cup okra in tamarind<br>gravy<br>¼ cup french beans &<br>carrot<br>Chickpeas curry:<br>1 cup chickpea<br>2 tbsp curry gravy<br>½ cup curd | <b>Lunch</b><br>1 medium bowl white rice<br>¼ cup okra in tamarind<br>gravy<br>¼ cup french beans &<br>carrot<br>Chicken and chickpea<br>curry:<br>1 oz chicken<br>1 cup chickpea<br>2 tbsp curry gravy<br>1 small bowl rasam |
| <b>Evening snack</b><br>1 pc apple                                                                                                                                                                                     | <b>Evening snack</b><br>1 pc apple                                                                                                                                                               | <b>Evening snack</b><br>1 pc apple                                                                                                                                                              | <b>Evening snack</b><br>1 pc apple                                                                                                                                                      | <b>Evening snack</b><br>1 pc apple                                                                                                                                                      | <b>Evening snack</b><br>1 pc apple                                                                                                                                                                                            |
| <b>Dinner</b><br>1 medium bowl white rice<br>¼ cup okra in tamarind<br>gravy<br>½ cup stir-fried cabbage<br>2½ oz deep fried fish<br>1 small bowl rasam<br>1 cup tea, 1 tbsp sugar                                     | <b>Dinner</b><br>1 medium bowl white rice<br>¼ cup okra in tamarind<br>gravy<br>½ cup stir-fried cabbage<br>1 cup sambar<br>1 small bowl rasam<br>1 cup tea, 1 tbsp sugar                        | <b>Dinner</b><br>1 medium bowl white rice<br>¼ cup okra in tamarind<br>gravy<br>½ cup stir-fried cabbage<br>2 pc fried egg<br>½ cup sambar<br>1 small bowl rasam<br>1 cup tea, 1 tbsp sugar     | <b>Dinner</b><br>1 medium bowl white rice<br>¼ cup okra in tamarind<br>gravy<br>½ cup stir-fried cabbage<br>½ cup sambar<br>½ cup curd<br>1 cup tea, 1 tbsp sugar                       | <b>Dinner</b><br>1 medium bowl white rice<br>¼ cup okra in tamarind<br>gravy<br>½ cup stir-fried cabbage<br>2 pc fried egg<br>½ cup curd<br>1 cup tea, 1 tbsp sugar                     | <b>Dinner</b><br>1 medium bowl white rice<br>¼ cup okra in tamarind<br>gravy<br>½ cup stir-fried cabbage<br>2 oz deep fried fish<br>1 small bowl rasam<br>1 cup tea, 1 tbsp sugar                                             |

**DAY 2 (North Indian Menu)**

| Conventional                                                                                                                              | Vegan                                                                                                                                          | Ovo-vegetarian                                                                                                                                | Lacto-vegetarian                                                                                                                              | Lacto-ovo vegetarian                                                                                                                                            | Plant-dominant                                                                                                                                                   |
|-------------------------------------------------------------------------------------------------------------------------------------------|------------------------------------------------------------------------------------------------------------------------------------------------|-----------------------------------------------------------------------------------------------------------------------------------------------|-----------------------------------------------------------------------------------------------------------------------------------------------|-----------------------------------------------------------------------------------------------------------------------------------------------------------------|------------------------------------------------------------------------------------------------------------------------------------------------------------------|
| <b>Breakfast</b><br>1 bowl vermicelli upma<br>1 cup tea, 1 tbsp sugar                                                                     | <b>Breakfast</b><br>1 bowl vermicelli upma<br>1 cup tea, 1 tbsp sugar                                                                          | <b>Breakfast</b><br>1 bowl vermicelli upma<br>1 cup tea, 1 tbsp sugar                                                                         | <b>Breakfast</b><br>1 bowl vermicelli upma<br>1 cup tea, 1 tbsp sugar                                                                         | <b>Breakfast</b><br>1 bowl vermicelli upma<br>1 cup tea, 1 tbsp sugar                                                                                           | <b>Breakfast</b><br>1 bowl vermicelli upma<br>1 cup tea, 1 tbsp sugar                                                                                            |
| <b>Morning snack</b><br>1 pc orange<br>1 cup tea, 1 tbsp sugar                                                                            | <b>Morning snack</b><br>1 pc orange                                                                                                            | <b>Morning snack</b><br>1 pc orange                                                                                                           | <b>Morning snack</b><br>1 pc orange                                                                                                           | <b>Morning snack</b><br>1 pc orange                                                                                                                             | <b>Morning snack</b><br>1 pc orange                                                                                                                              |
| <b>Lunch</b><br>1 medium bowl white rice<br>2½ oz masala chicken<br>½ cup okra kadai sabji<br>1 cup tea, 1 tbsp sugar                     | <b>Lunch</b><br>1 medium bowl white rice<br>1 cup masala chickpeas<br>½ cup okra kadai sabji                                                   | <b>Lunch</b><br>1 medium bowl white rice<br>2 pc masala egg<br>½ cup masala chickpeas<br>½ cup okra kadai sabji                               | <b>Lunch</b><br>1 medium bowl white rice<br>½ cup masala paneer<br>½ cup masala chickpeas<br>½ cup okra kadai sabji                           | <b>Lunch</b><br>1 medium bowl white rice<br>½ cup masala paneer<br>½ cup okra kadai sabji                                                                       | <b>Lunch</b><br>1 medium bowl white rice<br>1 oz masala chicken<br>1 cup masala chickpeas<br>½ cup okra kadai sabji                                              |
| <b>Evening snack</b><br>1 slice papaya                                                                                                    | <b>Evening snack</b><br>1 slice papaya                                                                                                         | <b>Evening snack</b><br>1 slice papaya                                                                                                        | <b>Evening snack</b><br>1 slice papaya                                                                                                        | <b>Evening snack</b><br>1 slice papaya                                                                                                                          | <b>Evening snack</b><br>1 slice papaya                                                                                                                           |
| <b>Dinner</b><br>1 medium bowl white rice<br>2 oz chili fish<br>½ cup curry eggplant<br>½ cup okra kadai sabji<br>1 cup tea, 1 tbsp sugar | <b>Dinner</b><br>1 medium bowl white rice<br>1½ cup chili lentils<br>½ cup curry eggplant<br>½ cup okra kadai sabji<br>1 cup tea, 1 tbsp sugar | <b>Dinner</b><br>1 medium bowl white rice<br>1 cup chili lentils<br>½ cup curry eggplant<br>½ cup okra kadai sabji<br>1 cup tea, 1 tbsp sugar | <b>Dinner</b><br>1 medium bowl white rice<br>1 cup chili lentils<br>½ cup curry eggplant<br>½ cup okra kadai sabji<br>1 cup tea, 1 tbsp sugar | <b>Dinner</b><br>1 medium bowl white rice<br>2 pc chili egg<br>½ cup chili lentils<br>½ cup curry eggplant<br>½ cup okra kadai sabji<br>1 cup tea, 1 tbsp sugar | <b>Dinner</b><br>1 medium bowl white rice<br>1 oz chili fish<br>½ cup chili lentils<br>½ cup curry eggplant<br>½ cup okra kadai sabji<br>1 cup tea, 1 tbsp sugar |

**DAY 3 (South Chinese Menu)**

| Conventional                                                                                                                                                       | Vegan                                                                                                                                                  | Ovo-vegetarian                                                                                                                                                     | Lacto-vegetarian                                                                                                                                      | Lacto-ovo vegetarian                                                                                                                            | Plant-dominant                                                                                                                                                                            |
|--------------------------------------------------------------------------------------------------------------------------------------------------------------------|--------------------------------------------------------------------------------------------------------------------------------------------------------|--------------------------------------------------------------------------------------------------------------------------------------------------------------------|-------------------------------------------------------------------------------------------------------------------------------------------------------|-------------------------------------------------------------------------------------------------------------------------------------------------|-------------------------------------------------------------------------------------------------------------------------------------------------------------------------------------------|
| <b>Breakfast</b><br>Rice noodles with pork<br>1 medium bowl rice<br>noodles<br>2 oz minced pork<br>¼ cup bok choy<br>1 cup tea, 1 tbsp sugar                       | <b>Breakfast</b><br>Rice noodles with tofu<br>1 medium bowl rice<br>noodles<br>1½ pc tofu<br>¼ cup bok choy<br>1 cup tea, 1 tbsp sugar                 | <b>Breakfast</b><br>Rice noodles with tofu<br>1 medium bowl rice<br>noodles<br>1 pc tofu<br>¼ cup bok choy<br>1 cup tea, 1 tbsp sugar                              | <b>Breakfast</b><br>Rice noodles with tofu<br>1 medium bowl rice<br>noodles<br>1 pc tofu<br>¼ cup bok choy<br>1 glass low fat milk                    | <b>Breakfast</b><br>Rice noodles with tofu<br>1 medium bowl rice<br>noodles<br>⅔ pc tofu<br>¼ cup bok choy<br>1 glass low fat milk              | <b>Breakfast</b><br>Rice noodles with tofu<br>1 medium bowl rice<br>noodles<br>1 pc tofu<br>¼ cup bok choy<br>1 cup tea, 1 tbsp sugar                                                     |
| <b>Morning snack</b><br>1 pc pear<br>1 cup tea, 1 tbsp sugar                                                                                                       | <b>Morning snack</b><br>1 pc pear                                                                                                                      | <b>Morning snack</b><br>1 pc pear                                                                                                                                  | <b>Morning snack</b><br>1 pc pear<br>½ glass low fat milk                                                                                             | <b>Morning snack</b><br>1 pc pear<br>½ glass low fat milk                                                                                       | <b>Morning snack</b><br>1 pc pear                                                                                                                                                         |
| <b>Lunch</b><br>1 medium bowl white rice<br>1½ oz steamed fish<br>½ cup cucumber, stir-fried<br>1 cup tea, 1 tbsp sugar                                            | <b>Lunch</b><br>1 medium bowl white rice<br>2 pc steamed tofu<br>½ cup cucumber, stir-fried                                                            | <b>Lunch</b><br>1 medium bowl white rice<br>3 oz steamed tofu<br>½ cup cucumber, stir-fried                                                                        | <b>Lunch</b><br>1 medium bowl white rice<br>1 pc steamed tofu<br>½ cup cucumber, stir-fried                                                           | <b>Lunch</b><br>1 medium bowl white rice<br>2/3 pc steamed tofu<br>½ cup cucumber, stir-fried                                                   | <b>Lunch</b><br>1 medium bowl white rice<br>1 oz steamed fish<br>1/3 pc steamed tofu<br>½ cup cucumber, stir-fried<br>1 cup tea, 1 tbsp sugar                                             |
| <b>Evening snack</b><br>1 pc apple                                                                                                                                 | <b>Evening snack</b><br>1 pc apple                                                                                                                     | <b>Evening snack</b><br>1 pc apple                                                                                                                                 | <b>Evening snack</b><br>1 pc apple<br>½ glass low fat milk                                                                                            | <b>Evening snack</b><br>1 pc apple<br>½ glass low fat milk                                                                                      | <b>Evening snack</b><br>1 pc apple                                                                                                                                                        |
| <b>Dinner</b><br>1 medium bowl white rice<br>1½ oz sesame oil chicken<br>sauce<br>½ cup carrot, stir-fried<br>½ cup spinach, stir-fried<br>1 cup tea, 1 tbsp sugar | <b>Dinner</b><br>1 medium bowl white rice<br>1½ pc deep fried tofu<br>½ cup carrot, stir-fried<br>½ cup spinach, stir-fried<br>1 cup tea, 1 tbsp sugar | <b>Dinner</b><br>1 medium bowl white rice<br>2 pc fried egg<br>3 oz fried tofu<br>½ cup carrot, stir-fried<br>½ cup spinach, stir-fried<br>1 cup tea, 1 tbsp sugar | <b>Dinner</b><br>1 medium bowl white rice<br>1 pc deep fried tofu<br>½ cup carrot, stir-fried<br>½ cup spinach, stir-fried<br>1 cup tea, 1 tbsp sugar | <b>Dinner</b><br>1 medium bowl white rice<br>2 pc fried egg<br>½ cup carrot, stir-fried<br>½ cup spinach, stir-fried<br>1 cup tea, 1 tbsp sugar | <b>Dinner</b><br>1 medium bowl white rice<br>1 pc deep fried tofu<br>1 oz sesame oil chicken<br>sauce<br>½ cup carrot, stir-fried<br>½ cup spinach, stir-fried<br>1 cup tea, 1 tbsp sugar |

\*Sugar may be replaced with honey, syrup, candies, or jam as other food choices.

Sample Menu for Moderate Protein Intake – 2100 kcal, 1.0 g/kg/d or 70 g/d protein  
**DAY 1 (South Indian Menu)**

| Conventional                                                                                                                                                                                              | Vegan                                                                                                                                                                                                          | Ovo-vegetarian                                                                                                                                                                                                | Lacto-vegetarian                                                                                                                                                                                      | Lacto-ovo vegetarian                                                                                                                                                                                  | Plant-dominant                                                                                                                                                                                                                              |
|-----------------------------------------------------------------------------------------------------------------------------------------------------------------------------------------------------------|----------------------------------------------------------------------------------------------------------------------------------------------------------------------------------------------------------------|---------------------------------------------------------------------------------------------------------------------------------------------------------------------------------------------------------------|-------------------------------------------------------------------------------------------------------------------------------------------------------------------------------------------------------|-------------------------------------------------------------------------------------------------------------------------------------------------------------------------------------------------------|---------------------------------------------------------------------------------------------------------------------------------------------------------------------------------------------------------------------------------------------|
| <b>Breakfast</b><br>3 pc dosa<br>2 tbsp curry gravy<br>1 cup tea, 1 tbsp sugar                                                                                                                            | <b>Breakfast</b><br>3 pc dosa<br>2 tbsp curry gravy                                                                                                                                                            | <b>Breakfast</b><br>3 pc dosa<br>2 tbsp curry gravy                                                                                                                                                           | <b>Breakfast</b><br>3 pc dosa<br>2 tbsp curry gravy                                                                                                                                                   | <b>Breakfast</b><br>3 pc dosa<br>2 tbsp curry gravy                                                                                                                                                   | <b>Breakfast</b><br>3 pc dosa<br>2 tbsp curry gravy                                                                                                                                                                                         |
| <b>Morning snack</b><br>3 pc cream crackers                                                                                                                                                               | <b>Morning snack</b><br>3 pc cream crackers                                                                                                                                                                    | <b>Morning snack</b><br>3 pc cream crackers                                                                                                                                                                   | <b>Morning snack</b><br>3 pc cream crackers                                                                                                                                                           | <b>Morning snack</b><br>3 pc cream crackers                                                                                                                                                           | <b>Morning snack</b><br>3 pc cream crackers                                                                                                                                                                                                 |
| <b>Lunch</b><br>1 medium bowl white rice<br>½ cup okra in tamarind<br>gravy<br>½ cup french beans &<br>carrot<br>Chicken curry:<br>2 oz chicken<br>2 tbsp curry gravy<br>1 small bowl rasam<br>½ pc mango | <b>Lunch</b><br>1 medium bowl white rice<br>½ cup okra in tamarind<br>gravy<br>½ cup french beans &<br>carrot<br>Chickpeas curry:<br>1½ cup chickpea<br>2 tbsp curry gravy<br>1 small bowl rasam<br>½ pc mango | <b>Lunch</b><br>1 medium bowl white rice<br>½ cup okra in tamarind<br>gravy<br>½ cup french beans &<br>carrot<br>Chickpeas curry:<br>1 cup chickpea<br>2 tbsp curry gravy<br>1 small bowl rasam<br>½ pc mango | <b>Lunch</b><br>1 medium bowl white rice<br>½ cup okra in tamarind<br>gravy<br>½ cup french beans &<br>carrot<br>Chickpeas curry:<br>1 cup chickpea<br>2 tbsp curry gravy<br>½ cup curd<br>½ pc mango | <b>Lunch</b><br>1 medium bowl white rice<br>½ cup okra in tamarind<br>gravy<br>½ cup french beans &<br>carrot<br>Chickpeas curry:<br>1 cup chickpea<br>2 tbsp curry gravy<br>½ cup curd<br>½ pc mango | <b>Lunch</b><br>1 medium bowl white rice<br>½ cup okra in tamarind<br>gravy<br>½ cup french beans &<br>carrot<br>Chicken and chickpea<br>curry:<br>1 oz chicken<br>½ cup chickpea<br>2 tbsp curry gravy<br>1 small bowl rasam<br>½ pc mango |
| <b>Evening snack</b><br>1 pc apple                                                                                                                                                                        | <b>Evening snack</b><br>1 pc apple                                                                                                                                                                             | <b>Evening snack</b><br>1 pc apple                                                                                                                                                                            | <b>Evening snack</b><br>1 pc apple                                                                                                                                                                    | <b>Evening snack</b><br>1 pc apple                                                                                                                                                                    | <b>Evening snack</b><br>1 pc apple                                                                                                                                                                                                          |
| <b>Dinner</b><br>1 medium bowl white rice<br>¼ cup okra in tamarind<br>gravy<br>½ cup stir-fried cabbage<br>2½ oz deep fried fish<br>1 small bowl rasam                                                   | <b>Dinner</b><br>1 medium bowl white rice<br>¼ cup okra in tamarind<br>gravy<br>½ cup stir-fried cabbage<br>1 cup sambar<br>1 small bowl rasam                                                                 | <b>Dinner</b><br>1 medium bowl white rice<br>¼ cup okra in tamarind<br>gravy<br>½ cup stir-fried cabbage<br>2 pc fried egg<br>½ cup sambar<br>1 small bowl rasam                                              | <b>Dinner</b><br>1 medium bowl white rice<br>¼ cup okra in tamarind<br>gravy<br>½ cup stir-fried cabbage<br>½ cup sambar<br>½ cup curd                                                                | <b>Dinner</b><br>1 medium bowl white rice<br>¼ cup okra in tamarind<br>gravy<br>½ cup stir-fried cabbage<br>2 pc fried egg<br>½ cup curd                                                              | <b>Dinner</b><br>1 medium bowl white rice<br>¼ cup okra in tamarind<br>gravy<br>½ cup stir-fried cabbage<br>2 oz deep fried fish<br>½ cup sambar<br>1 small bowl rasam                                                                      |

**DAY 2 (North Indian Menu)**

| Conventional                                                                                                                                         | Vegan                                                                                                               | Ovo-vegetarian                                                                                                      | Lacto-vegetarian                                                                                                    | Lacto-ovo vegetarian                                                                                                                 | Plant-dominant                                                                                                                                   |
|------------------------------------------------------------------------------------------------------------------------------------------------------|---------------------------------------------------------------------------------------------------------------------|---------------------------------------------------------------------------------------------------------------------|---------------------------------------------------------------------------------------------------------------------|--------------------------------------------------------------------------------------------------------------------------------------|--------------------------------------------------------------------------------------------------------------------------------------------------|
| <b>Breakfast</b><br>1 bowl vermicelli upma<br>2 tbsp peanuts<br>1 cup tea, 1 tbsp sugar                                                              | <b>Breakfast</b><br>1 bowl vermicelli upma<br>2 tbsp peanuts                                                                         | <b>Breakfast</b><br>1 bowl vermicelli upma<br>2 tbsp peanuts                                                                                     |
| <b>Morning snack</b><br>1 pc orange<br>1 cup tea, 1 tbsp sugar                                                                                       | <b>Morning snack</b><br>1 pc orange                                                                                                  | <b>Morning snack</b><br>1 pc orange                                                                                                              |
| <b>Lunch</b><br>1 medium bowl white rice<br>3 oz masala chicken<br>½ cup okra kadai sabji                                                            | <b>Lunch</b><br>1 medium bowl white rice<br>1½ cup masala chickpeas<br>½ cup okra kadai sabji                       | <b>Lunch</b><br>1 medium bowl white rice<br>2 pc masala egg<br>½ cup masala chickpeas<br>½ cup okra kadai sabji     | <b>Lunch</b><br>1 medium bowl white rice<br>½ cup masala paneer<br>½ cup masala chickpeas<br>½ cup okra kadai sabji | <b>Lunch</b><br>1 medium bowl white rice<br>½ cup masala paneer<br>½ cup masala chickpeas<br>½ cup okra kadai sabji                  | <b>Lunch</b><br>1 medium bowl white rice<br>2 oz masala chicken<br>½ cup masala chickpeas<br>½ cup okra kadai sabji                              |
| <b>Evening snack</b><br>1 slice papaya                                                                                                               | <b>Evening snack</b><br>1 slice papaya                                                                              | <b>Evening snack</b><br>1 slice papaya                                                                              | <b>Evening snack</b><br>1 slice papaya                                                                              | <b>Evening snack</b><br>1 slice papaya                                                                                               | <b>Evening snack</b><br>1 slice papaya                                                                                                           |
| <b>Dinner</b><br>1 medium bowl white rice<br>3 oz manchurian/chili fish<br>½ cup curry eggplant<br>½ cup okra kadai sabji<br>1 cup tea, 1 tbsp sugar | <b>Dinner</b><br>1 medium bowl white rice<br>1½ cup chili lentils<br>½ cup curry eggplant<br>½ cup okra kadai sabji | <b>Dinner</b><br>1 medium bowl white rice<br>1½ cup chili lentils<br>½ cup curry eggplant<br>½ cup okra kadai sabji | <b>Dinner</b><br>1 medium bowl white rice<br>1½ cup chili lentils<br>½ cup curry eggplant<br>½ cup okra kadai sabji | <b>Dinner</b><br>1 medium bowl white rice<br>2 pc chili egg<br>½ cup chili lentils<br>½ cup curry eggplant<br>½ cup okra kadai sabji | <b>Dinner</b><br>1 medium bowl white rice<br>1 oz manchurian/chili fish<br>½ cup chili lentils<br>½ cup curry eggplant<br>½ cup okra kadai sabji |

**DAY 3 (South Chinese Menu)**

| Conventional                                                                                                                                                      | Vegan                                                                                                                      | Ovo-vegetarian                                                                                                                          | Lacto-vegetarian                                                                                                                   | Lacto-ovo vegetarian                                                                                                                      | Plant-dominant                                                                                                                                  |
|-------------------------------------------------------------------------------------------------------------------------------------------------------------------|----------------------------------------------------------------------------------------------------------------------------|-----------------------------------------------------------------------------------------------------------------------------------------|------------------------------------------------------------------------------------------------------------------------------------|-------------------------------------------------------------------------------------------------------------------------------------------|-------------------------------------------------------------------------------------------------------------------------------------------------|
| <b>Breakfast</b><br>Rice noodles with pork<br>1 medium bowl rice<br>noodles<br>3 oz minced pork<br>¼ cup bok choy<br>1 cup tea, 1 tbsp sugar                      | <b>Breakfast</b><br>Rice noodles with tofu<br>1 medium bowl rice<br>noodles<br>2 pc tofu<br>¼ cup bok choy                 | <b>Breakfast</b><br>Rice noodles with tofu<br>1 medium bowl rice<br>noodles<br>1 pc tofu<br>¼ cup bok choy                              | <b>Breakfast</b><br>Rice noodles with tofu<br>1 medium bowl rice<br>noodles<br>1 pc tofu<br>¼ cup bok choy<br>1 glass low fat milk | <b>Breakfast</b><br>Rice noodles with tofu<br>1 medium bowl rice<br>noodles<br>1 pc tofu<br>¼ cup bok choy<br>1 glass low fat milk        | <b>Breakfast</b><br>Rice noodles with tofu<br>1 medium bowl rice<br>noodles<br>1 pc tofu<br>¼ cup bok choy                                      |
| <b>Morning snack</b><br>1 pc pear<br>1 cup tea, 1 tbsp sugar                                                                                                      | <b>Morning snack</b><br>1 pc pear<br>1 glass soybean milk                                                                  | <b>Morning snack</b><br>1 pc pear<br>1 glass soybean milk                                                                               | <b>Morning snack</b><br>1 pc pear<br>½ glass low fat milk                                                                          | <b>Morning snack</b><br>1 pc pear<br>½ glass low fat milk                                                                                 | <b>Morning snack</b><br>1 pc pear<br>1 glass soybean milk                                                                                       |
| <b>Lunch</b><br>1 medium bowl white rice<br>2 oz steamed fish<br>½ cup cucumber, stir-fried<br>1 cup tea, 1 tbsp sugar                                            | <b>Lunch</b><br>1 medium bowl white rice<br>2 pc steamed tofu<br>½ cup cucumber, stir-fried                                | <b>Lunch</b><br>1 medium bowl white rice<br>2 pc steamed tofu<br>½ cup cucumber, stir-fried                                             | <b>Lunch</b><br>1 medium bowl white rice<br>2 pc steamed tofu<br>½ cup cucumber, stir-fried                                        | <b>Lunch</b><br>1 medium bowl white rice<br>2 pc steamed tofu<br>½ cup cucumber, stir-fried                                               | <b>Lunch</b><br>1 medium bowl white rice<br>1 oz steamed fish<br>1 pc steamed tofu<br>½ cup cucumber, stir-fried                                |
| <b>Evening snack</b><br>1 pc apple                                                                                                                                | <b>Evening snack</b><br>1 pc apple                                                                                         | <b>Evening snack</b><br>1 pc apple                                                                                                      | <b>Evening snack</b><br>1 pc apple<br>½ glass low fat milk                                                                         | <b>Evening snack</b><br>1 pc apple<br>½ glass low fat milk                                                                                | <b>Evening snack</b><br>1 pc apple                                                                                                              |
| <b>Dinner</b><br>1 medium bowl white rice<br>2 oz sesame oil chicken<br>sauce<br>½ cup carrot, stir-fried<br>½ cup spinach, stir-fried<br>1 cup tea, 1 tbsp sugar | <b>Dinner</b><br>1 medium bowl white rice<br>2 pc deep fried tofu<br>½ cup carrot, stir-fried<br>½ cup spinach, stir-fried | <b>Dinner</b><br>1 medium bowl white rice<br>2 pc fried egg<br>1 pc fried tofu<br>½ cup carrot, stir-fried<br>½ cup spinach, stir-fried | <b>Dinner</b><br>1 medium bowl white rice<br>2 pc steamed tofu<br>½ cup carrot, stir-fried<br>½ cup spinach, stir-fried            | <b>Dinner</b><br>1 medium bowl white rice<br>2 pc fried egg<br>1 pc steamed tofu<br>½ cup carrot, stir-fried<br>½ cup spinach, stir-fried | <b>Dinner</b><br>1 medium bowl white rice<br>1 pc steamed tofu<br>1 oz steamed chicken<br>½ cup carrot, stir-fried<br>½ cup spinach, stir-fried |

\*Sugar may be replaced with honey, syrup, candies, or jam as other food choices.

Sample Menu for Moderate Protein Intake – 2100 kcal, 1.1 g/kg/d or 77 g/d protein  
**DAY 1 (South Indian Menu)**

| Conventional                                                                                                                                                                                              | Vegan                                                                                                                                                                                                          | Ovo-vegetarian                                                                                                                                                                                                | Lacto-vegetarian                                                                                                                                                                                      | Lacto-ovo vegetarian                                                                                                                                                                                  | Plant-dominant                                                                                                                                                                                                                              |
|-----------------------------------------------------------------------------------------------------------------------------------------------------------------------------------------------------------|----------------------------------------------------------------------------------------------------------------------------------------------------------------------------------------------------------------|---------------------------------------------------------------------------------------------------------------------------------------------------------------------------------------------------------------|-------------------------------------------------------------------------------------------------------------------------------------------------------------------------------------------------------|-------------------------------------------------------------------------------------------------------------------------------------------------------------------------------------------------------|---------------------------------------------------------------------------------------------------------------------------------------------------------------------------------------------------------------------------------------------|
| <b>Breakfast</b><br>3 pc dosa<br>2 tbsp curry gravy<br>½ cup sambar                                                                                                                                       | <b>Breakfast</b><br>3 pc dosa<br>2 tbsp curry gravy<br>½ cup sambar                                                                                                                                            | <b>Breakfast</b><br>3 pc dosa<br>2 tbsp curry gravy<br>½ cup sambar                                                                                                                                           | <b>Breakfast</b><br>3 pc dosa<br>2 tbsp curry gravy<br>½ cup sambar                                                                                                                                   | <b>Breakfast</b><br>3 pc dosa<br>2 tbsp curry gravy<br>½ cup sambar                                                                                                                                   | <b>Breakfast</b><br>3 pc dosa<br>2 tbsp curry gravy<br>½ cup sambar                                                                                                                                                                         |
| <b>Morning snack</b><br>3 pc cream crackers                                                                                                                                                               | <b>Morning snack</b><br>3 pc cream crackers                                                                                                                                                                    | <b>Morning snack</b><br>3 pc cream crackers                                                                                                                                                                   | <b>Morning snack</b><br>3 pc cream crackers<br>½ cup diluted buttermilk                                                                                                                               | <b>Morning snack</b><br>3 pc cream crackers<br>½ cup diluted buttermilk                                                                                                                               | <b>Morning snack</b><br>3 pc cream crackers                                                                                                                                                                                                 |
| <b>Lunch</b><br>1 medium bowl white rice<br>½ cup okra in tamarind<br>gravy<br>½ cup french beans &<br>carrot<br>Chicken curry:<br>2 oz chicken<br>2 tbsp curry gravy<br>1 small bowl rasam<br>½ pc mango | <b>Lunch</b><br>1 medium bowl white rice<br>½ cup okra in tamarind<br>gravy<br>½ cup french beans &<br>carrot<br>Chickpeas curry:<br>1½ cup chickpea<br>2 tbsp curry gravy<br>1 small bowl rasam<br>½ pc mango | <b>Lunch</b><br>1 medium bowl white rice<br>½ cup okra in tamarind<br>gravy<br>½ cup french beans &<br>carrot<br>Chickpeas curry:<br>1 cup chickpea<br>2 tbsp curry gravy<br>1 small bowl rasam<br>½ pc mango | <b>Lunch</b><br>1 medium bowl white rice<br>½ cup okra in tamarind<br>gravy<br>½ cup french beans &<br>carrot<br>Chickpeas curry:<br>1 cup chickpea<br>2 tbsp curry gravy<br>½ cup curd<br>½ pc mango | <b>Lunch</b><br>1 medium bowl white rice<br>½ cup okra in tamarind<br>gravy<br>½ cup french beans &<br>carrot<br>Chickpeas curry:<br>1 cup chickpea<br>2 tbsp curry gravy<br>½ cup curd<br>½ pc mango | <b>Lunch</b><br>1 medium bowl white rice<br>½ cup okra in tamarind<br>gravy<br>½ cup french beans &<br>carrot<br>Chicken and chickpea<br>curry:<br>1 oz chicken<br>½ cup chickpea<br>2 tbsp curry gravy<br>1 small bowl rasam<br>½ pc mango |
| <b>Evening snack</b><br>1 pc apple                                                                                                                                                                        | <b>Evening snack</b><br>1 pc apple                                                                                                                                                                             | <b>Evening snack</b><br>1 pc apple                                                                                                                                                                            | <b>Evening snack</b><br>1 pc apple                                                                                                                                                                    | <b>Evening snack</b><br>1 pc apple                                                                                                                                                                    | <b>Evening snack</b><br>1 pc apple                                                                                                                                                                                                          |
| <b>Dinner</b><br>1 medium bowl white rice<br>¼ cup okra in tamarind<br>gravy<br>½ cup stir-fried cabbage<br>3 oz pan fried fish<br>1 small bowl rasam                                                     | <b>Dinner</b><br>1 medium bowl white rice<br>¼ cup okra in tamarind<br>gravy<br>½ cup stir-fried cabbage<br>1½ cup sambar<br>1 small bowl rasam                                                                | <b>Dinner</b><br>1 medium bowl white rice<br>¼ cup okra in tamarind<br>gravy<br>½ cup stir-fried cabbage<br>2 pc fried egg<br>½ cup sambar<br>1 small bowl rasam                                              | <b>Dinner</b><br>1 medium bowl white rice<br>¼ cup okra in tamarind<br>gravy<br>½ cup stir-fried cabbage<br>1 cup sambar<br>½ cup curd                                                                | <b>Dinner</b><br>1 medium bowl white rice<br>¼ cup okra in tamarind<br>gravy<br>½ cup stir-fried cabbage<br>2 pc fried egg<br>½ cup curd                                                              | <b>Dinner</b><br>1 medium bowl white rice<br>¼ cup okra in tamarind<br>gravy<br>½ cup stir-fried cabbage<br>2 oz pan-fried fish<br>½ cup sambar<br>1 small bowl rasam                                                                       |



**DAY 2 (North Indian Menu)**

| Conventional                                                                                                                                         | Vegan                                                                                                                | Ovo-vegetarian                                                                                                     | Lacto-vegetarian                                                                                                     | Lacto-ovo vegetarian                                                                                                                 | Plant-dominant                                                                                                                        |
|------------------------------------------------------------------------------------------------------------------------------------------------------|----------------------------------------------------------------------------------------------------------------------|--------------------------------------------------------------------------------------------------------------------|----------------------------------------------------------------------------------------------------------------------|--------------------------------------------------------------------------------------------------------------------------------------|---------------------------------------------------------------------------------------------------------------------------------------|
| <b>Breakfast</b><br>1 bowl vermicelli upma<br>2 pc egg white<br>1 cup tea, 1 tbsp sugar                                                              | <b>Breakfast</b><br>1 bowl vermicelli upma<br>2 tbsp peanuts                                                         | <b>Breakfast</b><br>1 bowl vermicelli upma<br>2 tbsp peanuts<br>2 pc egg white                                     | <b>Breakfast</b><br>1 bowl vermicelli upma<br>2 tbsp peanuts                                                         | <b>Breakfast</b><br>1 bowl vermicelli upma<br>2 tbsp peanuts<br>2 pc egg white                                                       | <b>Breakfast</b><br>1 bowl vermicelli upma<br>2 tbsp peanuts                                                                          |
| <b>Morning snack</b><br>1 pc orange<br>1 cup tea, 1 tbsp sugar                                                                                       | <b>Morning snack</b><br>1 pc orange                                                                                  | <b>Morning snack</b><br>1 pc orange                                                                                | <b>Morning snack</b><br>1 pc orange                                                                                  | <b>Morning snack</b><br>1 pc orange                                                                                                  | <b>Morning snack</b><br>1 pc orange                                                                                                   |
| <b>Lunch</b><br>1 medium bowl white rice<br>3 oz masala chicken<br>½ cup okra kadai sabji<br>1 cup tea, 1 tbsp sugar                                 | <b>Lunch</b><br>1 medium bowl white rice<br>2 cup masala chickpeas<br>½ cup okra kadai sabji                         | <b>Lunch</b><br>1 medium bowl white rice<br>2 pc masala egg<br>½ cup masala chickpeas<br>½ cup okra kadai sabji    | <b>Lunch</b><br>1 medium bowl white rice<br>½ cup masala paneer<br>1 cup masala chickpeas<br>½ cup okra kadai sabji  | <b>Lunch</b><br>1 medium bowl white rice<br>½ cup masala paneer<br>½ cup masala chickpeas<br>½ cup okra kadai sabji                  | <b>Lunch</b><br>1 medium bowl white rice<br>2 oz masala chicken<br>½ cup masala chickpeas<br>½ cup okra kadai sabji                   |
| <b>Evening snack</b><br>1 slice papaya                                                                                                               | <b>Evening snack</b><br>1 slice papaya                                                                               | <b>Evening snack</b><br>1 slice papaya                                                                             | <b>Evening snack</b><br>1 slice papaya                                                                               | <b>Evening snack</b><br>1 slice papaya                                                                                               | <b>Evening snack</b><br>1 slice papaya                                                                                                |
| <b>Dinner</b><br>1 medium bowl white rice<br>3 oz manchurian/chili fish<br>½ cup curry eggplant<br>½ cup okra kadai sabji<br>1 cup tea, 1 tbsp sugar | <b>Dinner</b><br>1 medium bowl white rice<br>1 ½ cup chili lentils<br>½ cup curry eggplant<br>½ cup okra kadai sabji | <b>Dinner</b><br>1 medium bowl white rice<br>1 cup chili lentils<br>½ cup curry eggplant<br>½ cup okra kadai sabji | <b>Dinner</b><br>1 medium bowl white rice<br>1 ½ cup chili lentils<br>½ cup curry eggplant<br>½ cup okra kadai sabji | <b>Dinner</b><br>1 medium bowl white rice<br>2 pc chili egg<br>½ cup chili lentils<br>½ cup curry eggplant<br>½ cup okra kadai sabji | <b>Dinner</b><br>1 medium bowl white rice<br>2 oz chili fish<br>1 cup chili lentils<br>½ cup curry eggplant<br>½ cup okra kadai sabji |

**DAY 3 (South Chinese Menu)**

| Conventional                                                                                                                                          | Vegan                                                                                                                    | Ovo-vegetarian                                                                                                                              | Lacto-vegetarian                                                                                                                   | Lacto-ovo vegetarian                                                                                                                      | Plant-dominant                                                                                                                                  |
|-------------------------------------------------------------------------------------------------------------------------------------------------------|--------------------------------------------------------------------------------------------------------------------------|---------------------------------------------------------------------------------------------------------------------------------------------|------------------------------------------------------------------------------------------------------------------------------------|-------------------------------------------------------------------------------------------------------------------------------------------|-------------------------------------------------------------------------------------------------------------------------------------------------|
| <b>Breakfast</b><br>Rice noodles with pork<br>1 medium bowl rice<br>noodles<br>3 oz minced pork<br>¼ cup bok choy<br>1 cup tea, 1 tbsp sugar          | <b>Breakfast</b><br>Rice noodles with tofu<br>1 medium bowl rice<br>noodles<br>2 pc tofu<br>¼ cup bok choy               | <b>Breakfast</b><br>Rice noodles with tofu<br>1 medium bowl rice<br>noodles<br>2 pc tofu<br>¼ cup bok choy                                  | <b>Breakfast</b><br>Rice noodles with tofu<br>1 medium bowl rice<br>noodles<br>2 pc tofu<br>¼ cup bok choy<br>1 glass low fat milk | <b>Breakfast</b><br>Rice noodles with tofu<br>1 medium bowl rice<br>noodles<br>2 pc tofu<br>¼ cup bok choy<br>1 glass low fat milk        | <b>Breakfast</b><br>Rice noodles with tofu<br>1 medium bowl rice<br>noodles<br>1 pc tofu<br>¼ cup bok choy                                      |
| <b>Morning snack</b><br>1 pc pear<br>1 cup tea, 1 tbsp sugar                                                                                          | <b>Morning snack</b><br>1 pc pear<br>1 glass soybean milk                                                                | <b>Morning snack</b><br>1 pc pear<br>1 glass soybean milk                                                                                   | <b>Morning snack</b><br>1 pc pear<br>½ glass low fat milk                                                                          | <b>Morning snack</b><br>1 pc pear<br>½ glass low fat milk                                                                                 | <b>Morning snack</b><br>1 pc pear<br>1 glass soybean milk                                                                                       |
| <b>Lunch</b><br>1 medium bowl white rice<br>2 oz steamed fish<br>½ cup cucumber, stir-fried<br>1 cup tea, 1 tbsp sugar                                | <b>Lunch</b><br>1 medium bowl white rice<br>2 pc steamed tofu<br>½ cup cucumber, stir-fried                              | <b>Lunch</b><br>1 medium bowl white rice<br>2 pc steamed tofu<br>½ cup cucumber, stir-fried                                                 | <b>Lunch</b><br>1 medium bowl white rice<br>2 pc steamed tofu<br>½ cup cucumber, stir-fried                                        | <b>Lunch</b><br>1 medium bowl white rice<br>2 pc steamed tofu<br>½ cup cucumber, stir-fried                                               | <b>Lunch</b><br>1 medium bowl white rice<br>1 oz steamed fish<br>2 pc steamed tofu<br>½ cup cucumber, stir-fried                                |
| <b>Evening snack</b><br>1 pc apple                                                                                                                    | <b>Evening snack</b><br>1 pc apple                                                                                       | <b>Evening snack</b><br>1 pc apple                                                                                                          | <b>Evening snack</b><br>1 pc apple<br>½ glass low fat milk                                                                         | <b>Evening snack</b><br>1 pc apple<br>½ glass low fat milk                                                                                | <b>Evening snack</b><br>1 pc apple                                                                                                              |
| <b>Dinner</b><br>1 medium bowl white rice<br>3 oz steamed chicken<br>½ cup carrot, stir-fried<br>½ cup spinach, stir-fried<br>1 cup tea, 1 tbsp sugar | <b>Dinner</b><br>1 medium bowl white rice<br>2⅔ pc steamed tofu<br>½ cup carrot, stir-fried<br>½ cup spinach, stir-fried | <b>Dinner</b><br>1 medium bowl white rice<br>2 pc fried egg<br>1 1/3 pc fried tofu<br>½ cup carrot, stir-fried<br>½ cup spinach, stir-fried | <b>Dinner</b><br>1 medium bowl white rice<br>2 pc steamed tofu<br>½ cup carrot, stir-fried<br>½ cup spinach, stir-fried            | <b>Dinner</b><br>1 medium bowl white rice<br>2 pc fried egg<br>1 pc steamed tofu<br>½ cup carrot, stir-fried<br>½ cup spinach, stir-fried | <b>Dinner</b><br>1 medium bowl white rice<br>1 pc steamed tofu<br>1 oz steamed chicken<br>½ cup carrot, stir-fried<br>½ cup spinach, stir-fried |

\*Sugar may be replaced with honey, syrup, candies, or jam as other food choices.

Sample Menu for Moderate Protein Intake – 2100 kcal, 1.2 g/kg/d or 84 g/d protein  
**DAY 1 (South Indian Menu)**

| Conventional                                                                                                                                                                                              | Vegan                                                                                                                                                                                                          | Ovo-vegetarian                                                                                                                                                                                                  | Lacto-vegetarian                                                                                                                                                                                      | Lacto-ovo vegetarian                                                                                                                                                                                  | Plant-dominant                                                                                                                                                                                                                              |
|-----------------------------------------------------------------------------------------------------------------------------------------------------------------------------------------------------------|----------------------------------------------------------------------------------------------------------------------------------------------------------------------------------------------------------------|-----------------------------------------------------------------------------------------------------------------------------------------------------------------------------------------------------------------|-------------------------------------------------------------------------------------------------------------------------------------------------------------------------------------------------------|-------------------------------------------------------------------------------------------------------------------------------------------------------------------------------------------------------|---------------------------------------------------------------------------------------------------------------------------------------------------------------------------------------------------------------------------------------------|
| <b>Breakfast</b><br>3 pc dosa<br>2 tbsp curry gravy<br>½ cup sambar                                                                                                                                       | <b>Breakfast</b><br>3 pc dosa<br>2 tbsp curry gravy<br>1 cup sambar                                                                                                                                            | <b>Breakfast</b><br>3 pc dosa<br>2 tbsp curry gravy<br>½ cup sambar                                                                                                                                             | <b>Breakfast</b><br>3 pc dosa<br>2 tbsp curry gravy<br>½ cup sambar                                                                                                                                   | <b>Breakfast</b><br>3 pc dosa<br>2 tbsp curry gravy<br>½ cup sambar                                                                                                                                   | <b>Breakfast</b><br>3 pc dosa<br>2 tbsp curry gravy<br>½ cup sambar                                                                                                                                                                         |
| <b>Morning snack</b><br>3 pc cream crackers                                                                                                                                                               | <b>Morning snack</b><br>3 pc cream crackers                                                                                                                                                                    | <b>Morning snack</b><br>3 pc cream crackers                                                                                                                                                                     | <b>Morning snack</b><br>3 pc cream crackers<br>½ cup diluted buttermilk                                                                                                                               | <b>Morning snack</b><br>3 pc cream crackers<br>½ cup diluted buttermilk                                                                                                                               | <b>Morning snack</b><br>3 pc cream crackers                                                                                                                                                                                                 |
| <b>Lunch</b><br>1 medium bowl white rice<br>½ cup okra in tamarind<br>gravy<br>½ cup french beans &<br>carrot<br>Chicken curry:<br>3 oz chicken<br>2 tbsp curry gravy<br>1 small bowl rasam<br>½ pc mango | <b>Lunch</b><br>1 medium bowl white rice<br>½ cup okra in tamarind<br>gravy<br>½ cup french beans &<br>carrot<br>Chickpeas curry:<br>1½ cup chickpea<br>2 tbsp curry gravy<br>1 small bowl rasam<br>½ pc mango | <b>Lunch</b><br>1 medium bowl white rice<br>½ cup okra in tamarind<br>gravy<br>½ cup french beans &<br>carrot<br>Chickpeas curry:<br>1 ½ cup chickpea<br>2 tbsp curry gravy<br>1 small bowl rasam<br>½ pc mango | <b>Lunch</b><br>1 medium bowl white rice<br>½ cup okra in tamarind<br>gravy<br>½ cup french beans &<br>carrot<br>Chickpeas curry:<br>1 cup chickpea<br>2 tbsp curry gravy<br>½ cup curd<br>½ pc mango | <b>Lunch</b><br>1 medium bowl white rice<br>½ cup okra in tamarind<br>gravy<br>½ cup french beans &<br>carrot<br>Chickpeas curry:<br>1 cup chickpea<br>2 tbsp curry gravy<br>½ cup curd<br>½ pc mango | <b>Lunch</b><br>1 medium bowl white rice<br>½ cup okra in tamarind<br>gravy<br>½ cup french beans &<br>carrot<br>Chicken and chickpea<br>curry:<br>1 oz chicken<br>½ cup chickpea<br>2 tbsp curry gravy<br>1 small bowl rasam<br>½ pc mango |
| <b>Evening snack</b><br>1 pc apple                                                                                                                                                                        | <b>Evening snack</b><br>1 pc apple                                                                                                                                                                             | <b>Evening snack</b><br>1 pc apple                                                                                                                                                                              | <b>Evening snack</b><br>1 pc apple                                                                                                                                                                    | <b>Evening snack</b><br>1 pc apple                                                                                                                                                                    | <b>Evening snack</b><br>1 pc apple                                                                                                                                                                                                          |
| <b>Dinner</b><br>1 medium bowl white rice<br>¼ cup okra in tamarind<br>gravy<br>½ cup stir-fried cabbage<br>3 oz pan fried fish<br>1 small bowl rasam<br>1 cup tea, 1 tbsp sugar                          | <b>Dinner</b><br>1 medium bowl white rice<br>¼ cup okra in tamarind<br>gravy<br>½ cup stir-fried cabbage<br>1½ cup sambar<br>1 small bowl rasam                                                                | <b>Dinner</b><br>1 medium bowl white rice<br>¼ cup okra in tamarind<br>gravy<br>½ cup stir-fried cabbage<br>2 pc fried egg<br>½ cup sambar<br>1 small bowl rasam                                                | <b>Dinner</b><br>1 medium bowl white rice<br>¼ cup okra in tamarind<br>gravy<br>½ cup stir-fried cabbage<br>1½ cup sambar<br>½ cup curd                                                               | <b>Dinner</b><br>1 medium bowl white rice<br>¼ cup okra in tamarind<br>gravy<br>½ cup stir-fried cabbage<br>2 pc fried egg<br>½ cup sambar<br>½ cup curd                                              | <b>Dinner</b><br>1 medium bowl white rice<br>¼ cup okra in tamarind<br>gravy<br>½ cup stir-fried cabbage<br>2 oz pan-fried fish<br>1 cup sambar<br>1 small bowl rasam                                                                       |

**DAY 2 (North Indian Menu)**

| Conventional                                                                                                                                          | Vegan                                                                                                              | Ovo-vegetarian                                                                                                      | Lacto-vegetarian                                                                                                     | Lacto-ovo vegetarian                                                                                                                 | Plant-dominant                                                                                                                        |
|-------------------------------------------------------------------------------------------------------------------------------------------------------|--------------------------------------------------------------------------------------------------------------------|---------------------------------------------------------------------------------------------------------------------|----------------------------------------------------------------------------------------------------------------------|--------------------------------------------------------------------------------------------------------------------------------------|---------------------------------------------------------------------------------------------------------------------------------------|
| <b>Breakfast</b><br>1 bowl vermicelli upma<br>2 pc egg white<br>1 cup tea, 1 tbsp sugar                                                               | <b>Breakfast</b><br>1 bowl vermicelli upma<br>2 tbsp peanuts                                                       | <b>Breakfast</b><br>1 bowl vermicelli upma<br>2 tbsp peanuts<br>2 pc egg white                                      | <b>Breakfast</b><br>1 bowl vermicelli upma<br>2 tbsp peanuts                                                         | <b>Breakfast</b><br>1 bowl vermicelli upma<br>2 tbsp peanuts<br>2 pc egg white                                                       | <b>Breakfast</b><br>1 bowl vermicelli upma<br>2 tbsp peanuts                                                                          |
| <b>Morning snack</b><br>1 pc orange<br>1 cup tea, 1 tbsp sugar                                                                                        | <b>Morning snack</b><br>1 pc orange                                                                                | <b>Morning snack</b><br>1 pc orange                                                                                 | <b>Morning snack</b><br>1 pc orange                                                                                  | <b>Morning snack</b><br>1 pc orange                                                                                                  | <b>Morning snack</b><br>1 pc orange                                                                                                   |
| <b>Lunch</b><br>1 medium bowl white rice<br>3½ oz masala chicken<br>½ cup okra kadai sabji<br>1 cup tea, 1 tbsp sugar                                 | <b>Lunch</b><br>1 medium bowl white rice<br>2 cup masala chickpeas<br>½ cup okra kadai sabji                       | <b>Lunch</b><br>1 medium bowl white rice<br>2 pc masala egg<br>1 cup masala chickpeas<br>½ cup okra kadai sabji     | <b>Lunch</b><br>1 medium bowl white rice<br>½ cup masala paneer<br>1½ cup masala chickpeas<br>½ cup okra kadai sabji | <b>Lunch</b><br>1 medium bowl white rice<br>½ cup masala paneer<br>1 cup masala chickpeas<br>½ cup okra kadai sabji                  | <b>Lunch</b><br>1 medium bowl white rice<br>2 oz masala chicken<br>1 cup masala chickpeas<br>½ cup okra kadai sabji                   |
| <b>Evening snack</b><br>1 slice papaya                                                                                                                | <b>Evening snack</b><br>1 slice papaya                                                                             | <b>Evening snack</b><br>1 slice papaya                                                                              | <b>Evening snack</b><br>1 slice papaya                                                                               | <b>Evening snack</b><br>1 slice papaya                                                                                               | <b>Evening snack</b><br>1 slice papaya<br>2 tbsp peanuts                                                                              |
| <b>Dinner</b><br>1 medium bowl white rice<br>3½ oz manchurian/chili fish<br>½ cup curry eggplant<br>½ cup okra kadai sabji<br>1 cup tea, 1 tbsp sugar | <b>Dinner</b><br>1 medium bowl white rice<br>2 cup chili lentils<br>½ cup curry eggplant<br>½ cup okra kadai sabji | <b>Dinner</b><br>1 medium bowl white rice<br>1½ cup chili lentils<br>½ cup curry eggplant<br>½ cup okra kadai sabji | <b>Dinner</b><br>1 medium bowl white rice<br>1½ cup chili lentils<br>½ cup curry eggplant<br>½ cup okra kadai sabji  | <b>Dinner</b><br>1 medium bowl white rice<br>2 pc chili egg<br>½ cup chili lentils<br>½ cup curry eggplant<br>½ cup okra kadai sabji | <b>Dinner</b><br>1 medium bowl white rice<br>2 oz chili fish<br>1 cup chili lentils<br>½ cup curry eggplant<br>½ cup okra kadai sabji |

### DAY 3 (South Chinese Menu)

| Conventional                                                                                                                                          | Vegan                                                                                                                    | Ovo-vegetarian                                                                                                                          | Lacto-vegetarian                                                                                                                   | Lacto-ovo vegetarian                                                                                                                                                 | Plant-dominant                                                                                                                                  |
|-------------------------------------------------------------------------------------------------------------------------------------------------------|--------------------------------------------------------------------------------------------------------------------------|-----------------------------------------------------------------------------------------------------------------------------------------|------------------------------------------------------------------------------------------------------------------------------------|----------------------------------------------------------------------------------------------------------------------------------------------------------------------|-------------------------------------------------------------------------------------------------------------------------------------------------|
| <b>Breakfast</b><br>Rice noodles with pork<br>1 medium bowl rice<br>noodles<br>3 oz minced pork<br>¼ cup bok choy<br>1 cup tea, 1 tbsp sugar          | <b>Breakfast</b><br>Rice noodles with tofu<br>1 medium bowl rice<br>noodles<br>2 pc tofu<br>¼ cup bok choy               | <b>Breakfast</b><br>Rice noodles with tofu<br>1 medium bowl rice<br>noodles<br>2 pc tofu<br>¼ cup bok choy                              | <b>Breakfast</b><br>Rice noodles with tofu<br>1 medium bowl rice<br>noodles<br>2 pc tofu<br>¼ cup bok choy<br>1 glass low fat milk | <b>Breakfast</b><br>Rice noodles with tofu<br>1 medium bowl rice<br>noodles<br>2 pc tofu<br>¼ cup bok choy<br>1 glass low fat milk                                   | <b>Breakfast</b><br>Rice noodles with tofu<br>1 medium bowl rice<br>noodles<br>1 pc tofu<br>¼ cup bok choy                                      |
| <b>Morning snack</b><br>1 pc pear<br>1 cup tea, 1 tbsp sugar                                                                                          | <b>Morning snack</b><br>1 pc pear<br>1 glass soybean milk                                                                | <b>Morning snack</b><br>1 pc pear<br>1 glass soybean milk                                                                               | <b>Morning snack</b><br>1 pc pear<br>½ glass low fat milk                                                                          | <b>Morning snack</b><br>1 pc pear<br>½ glass low fat milk                                                                                                            | <b>Morning snack</b><br>1 pc pear<br>1 glass soybean milk                                                                                       |
| <b>Lunch</b><br>1 medium bowl white rice<br>3 oz steamed fish<br>½ cup cucumber, stir-fried<br>1 cup tea, 1 tbsp sugar                                | <b>Lunch</b><br>1 medium bowl white rice<br>2⅔ pc steamed tofu<br>½ cup cucumber, stir-fried                             | <b>Lunch</b><br>1 medium bowl white rice<br>2⅔ pc steamed tofu<br>½ cup cucumber, stir-fried                                            | <b>Lunch</b><br>1 medium bowl white rice<br>2⅔ pc steamed tofu<br>½ cup cucumber, stir-fried                                       | <b>Lunch</b><br>1 medium bowl white rice<br>2 pc steamed tofu<br>½ cup cucumber, stir-fried                                                                          | <b>Lunch</b><br>1 medium bowl white rice<br>2 oz steamed fish<br>2 pc steamed tofu<br>½ cup cucumber, stir-fried                                |
| <b>Evening snack</b><br>1 pc apple                                                                                                                    | <b>Evening snack</b><br>1 pc apple                                                                                       | <b>Evening snack</b><br>1 pc apple                                                                                                      | <b>Evening snack</b><br>1 pc apple<br>½ glass low fat milk                                                                         | <b>Evening snack</b><br>1 pc apple<br>½ glass low fat milk                                                                                                           | <b>Evening snack</b><br>1 pc apple                                                                                                              |
| <b>Dinner</b><br>1 medium bowl white rice<br>3 oz steamed chicken<br>½ cup carrot, stir-fried<br>½ cup spinach, stir-fried<br>1 cup tea, 1 tbsp sugar | <b>Dinner</b><br>1 medium bowl white rice<br>2⅔ pc steamed tofu<br>½ cup carrot, stir-fried<br>½ cup spinach, stir-fried | <b>Dinner</b><br>1 medium bowl white rice<br>2 pc fried egg<br>1 pc fried tofu<br>½ cup carrot, stir-fried<br>½ cup spinach, stir-fried | <b>Dinner</b><br>1 medium bowl white rice<br>2⅔ pc steamed tofu<br>½ cup carrot, stir-fried<br>½ cup spinach, stir-fried           | <b>Dinner</b><br>1 medium bowl white rice<br>2 pc fried egg<br>2 pc steamed tofu<br>½ cup carrot, stir-fried<br>½ cup spinach, stir-fried<br>1 cup tea, 1 tbsp sugar | <b>Dinner</b><br>1 medium bowl white rice<br>1 pc steamed tofu<br>1 oz steamed chicken<br>½ cup carrot, stir-fried<br>½ cup spinach, stir-fried |

\*Sugar may be replaced with honey, syrup, candies, or jam as other food choices.
